# Supplementary material for: Genomic Analysis Highlights Putative Defective Susceptibility Genes in Tomato Germplasm
Source: MDPI journal article supplement (doi:10.3390/plants12122289), 2023-06-12
Supplement: s1 [file s1]

**VF-36**

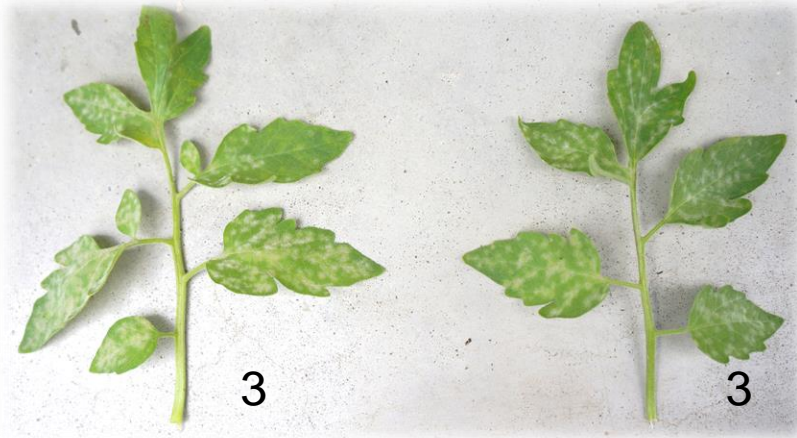

**Droplet**

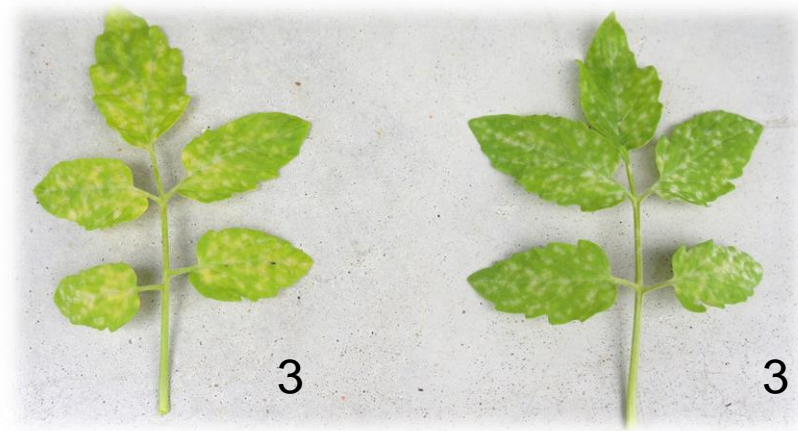

**Puno-I**

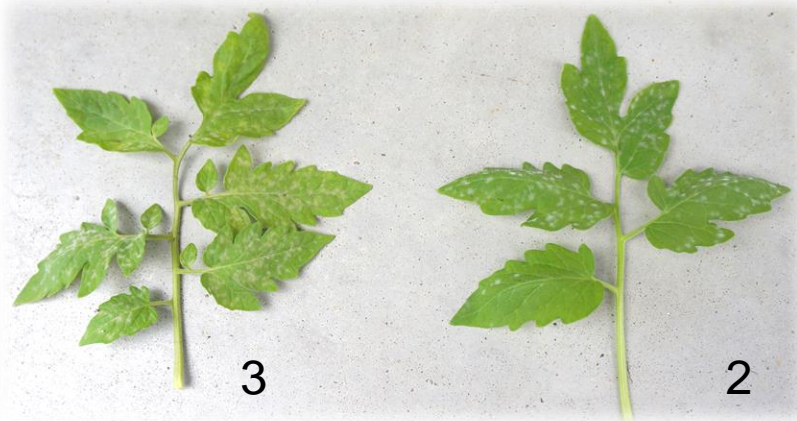

**MM**

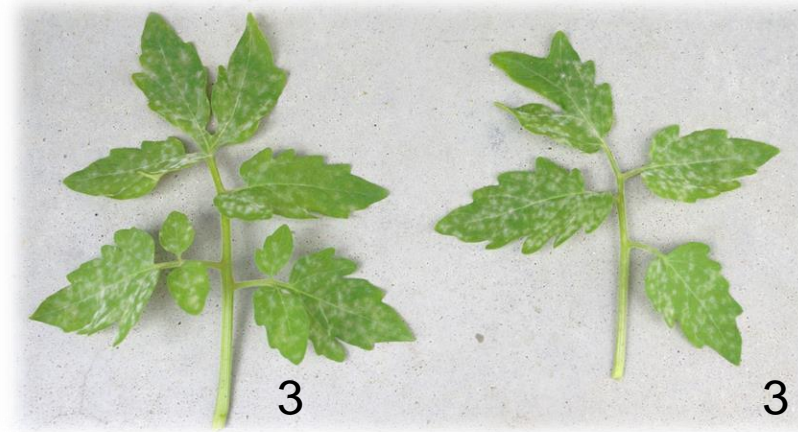

**M-82**

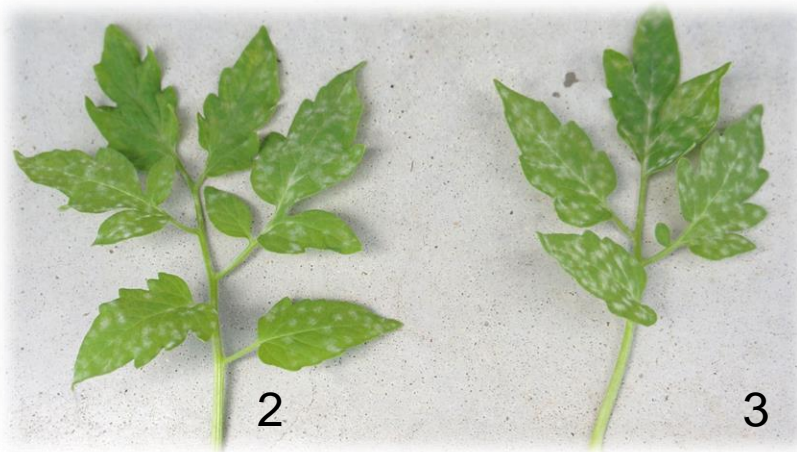

**Figure S3.** Example of results obtained with a pathogen assay performed with *Oidium neolycopersici* on four varieties (VF-36, M-82, Droplet, Puno-I) and a control variety (Moneymaker, MM) at 8 days post-inoculation (dpi). Disease scores were marked at the right corner of the leaves.
