# Supplementary material for: Genomic Analysis Highlights Putative Defective Susceptibility Genes in Tomato Germplasm
Source: MDPI journal article supplement (doi:10.3390/plants12122289), 2023-06-12
Supplement: s1 [file s1]

BIK - Solyc01g008860 – chr1

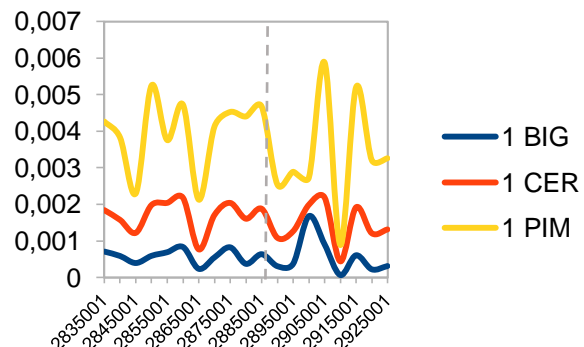

BIK - Solyc01g028830 – chr1

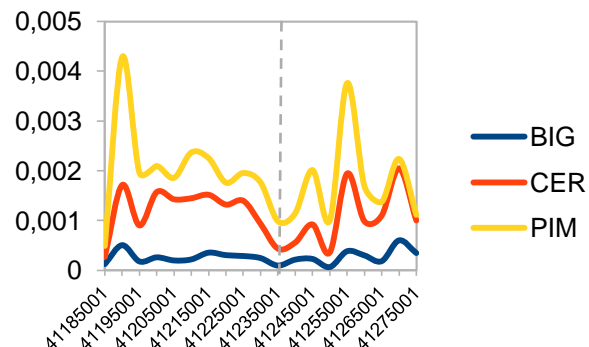

BIK - Solyc01g067400 - chr1

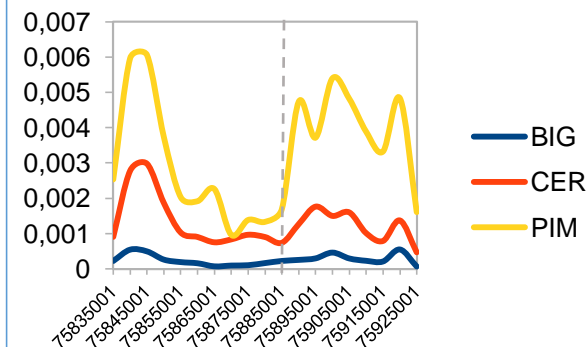

BIK - Solyc04g050970 – chr4

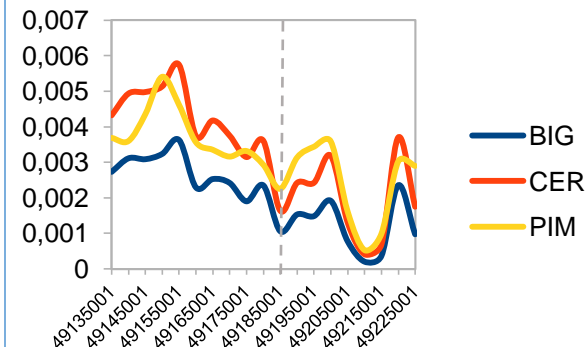

BIK - Solyc05g007050 - chr5

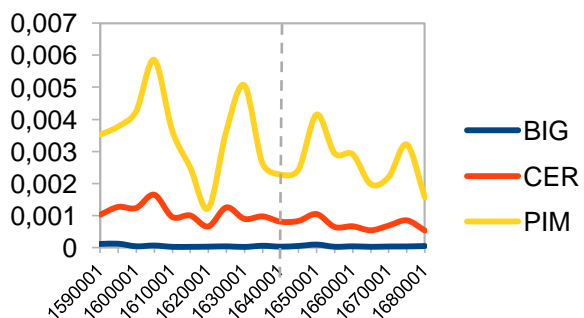

BIK - Solyc05g024290 - chr5

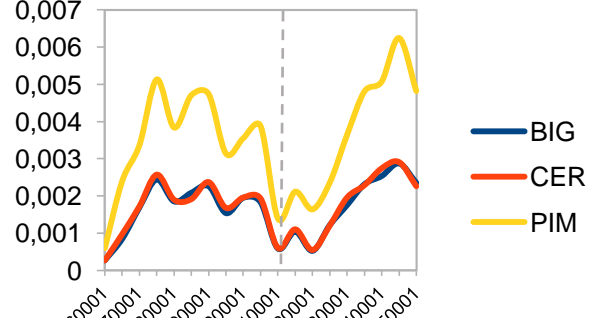

BIK - Solyc06g005500 - chr6

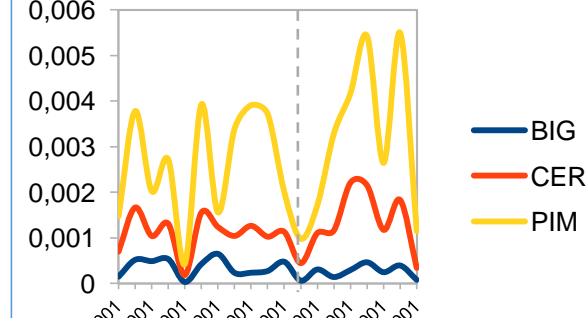

BIK - Solyc06g062920 - chr6

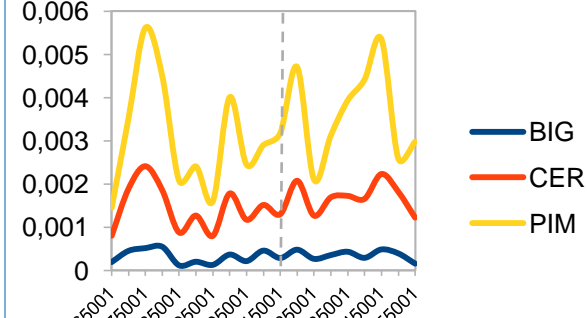

BIK - Solyc06g083500 - chr6

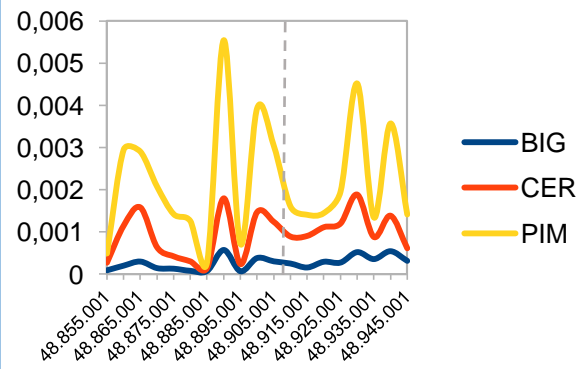

BIK - Solyc08g077560 - chr8

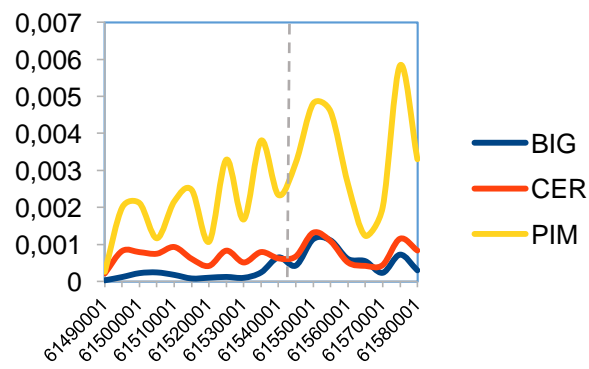

DMR1 - Solyc04g008760 - chr8

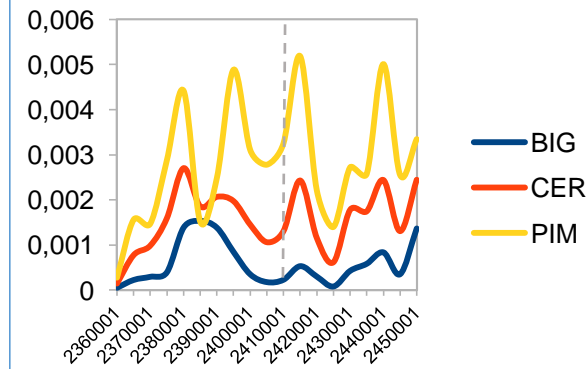

DMR6 - Solyc03g080190 - chr3

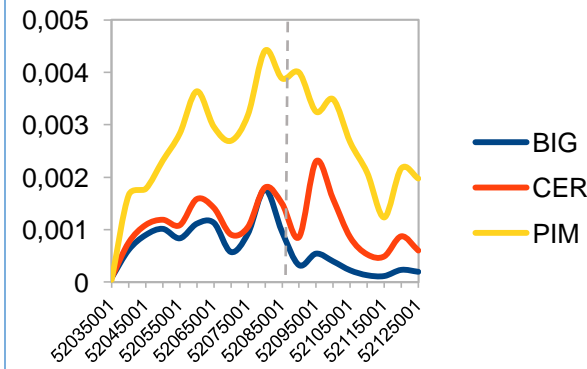

DND - Solyc02g088560 - chr2

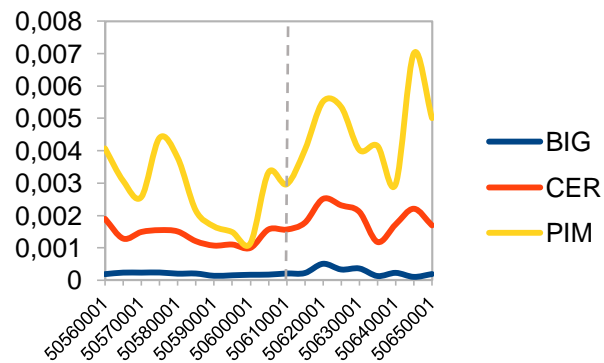

MLO - Solyc02g077570 - chr2

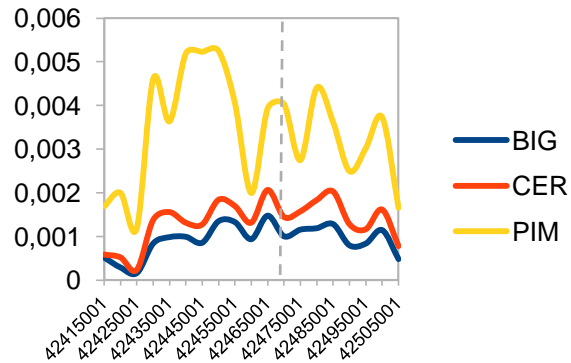

MLO - Solyc06g082820 - chr6

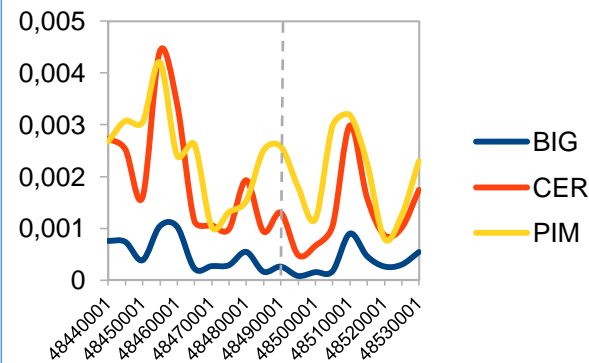

PMR4 - Solyc01g006350 - chr1

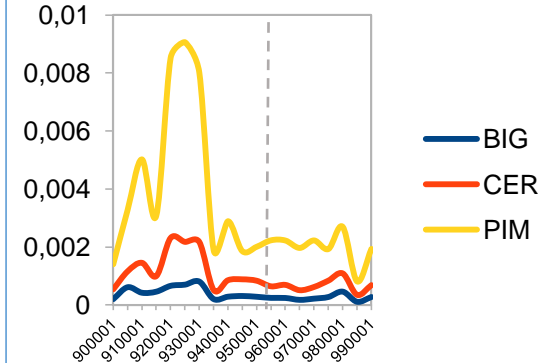

PMR4 - Solyc01g073750 - chr1

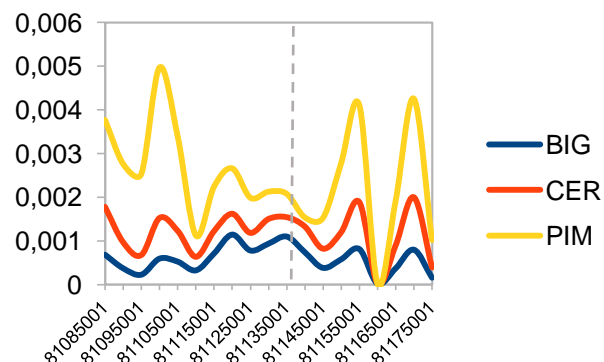

PMR4 - Solyc07g056260 - chr7

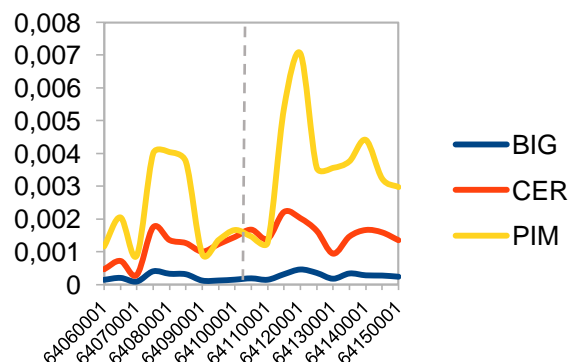

PMR5 - Solyc02g082950 - chr2

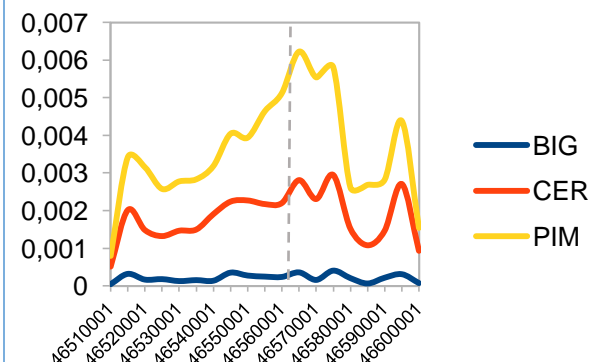

PMR5 - Solyc03g006220 - chr3

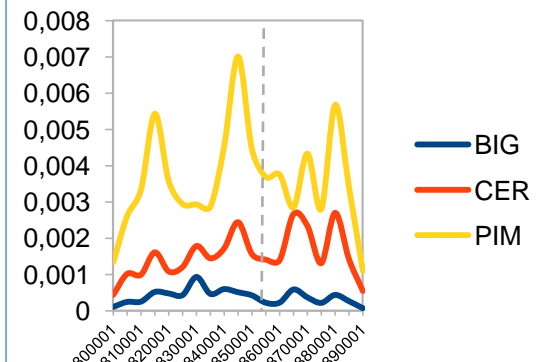

PMR5 - Solyc07g053350 - chr7

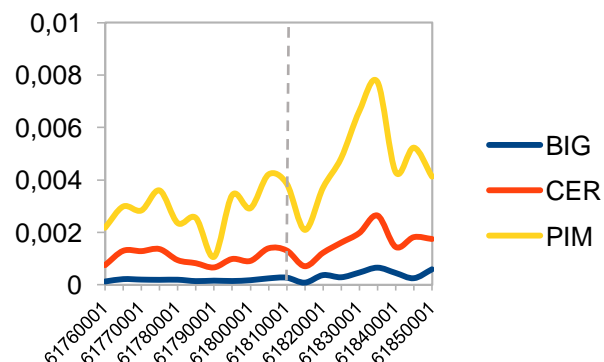

PMR6 - Solyc02g067450 - chr2

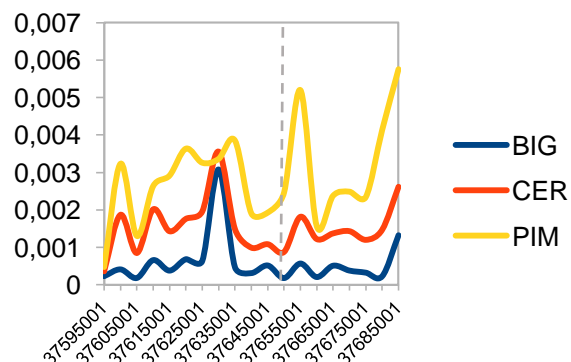

PMR6 - Solyc02g080910 - chr2

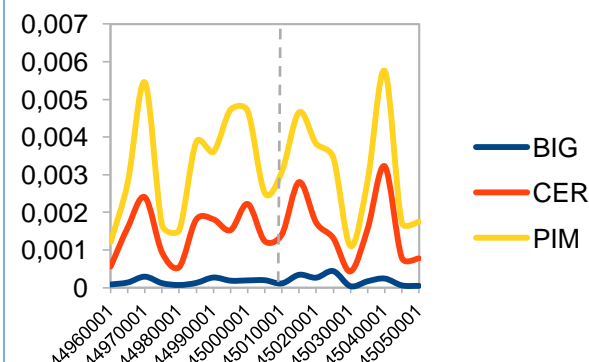

PMR6 - Solyc02g093580 - chr2

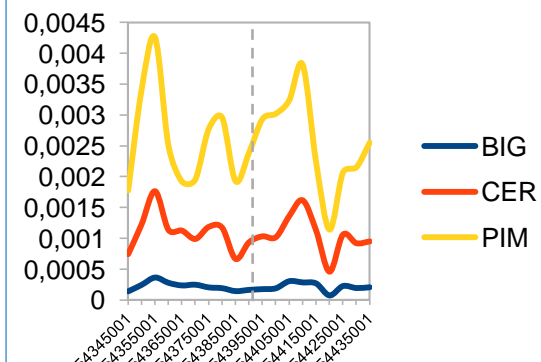

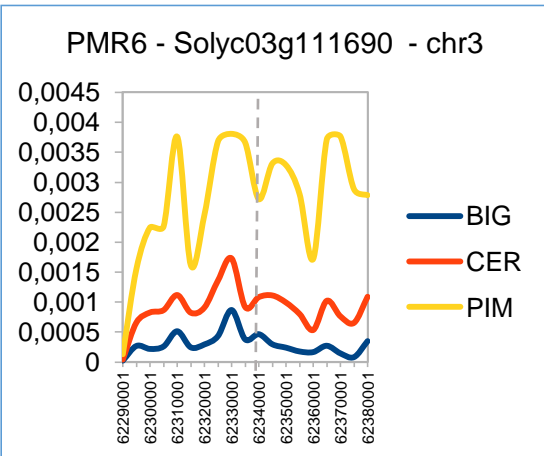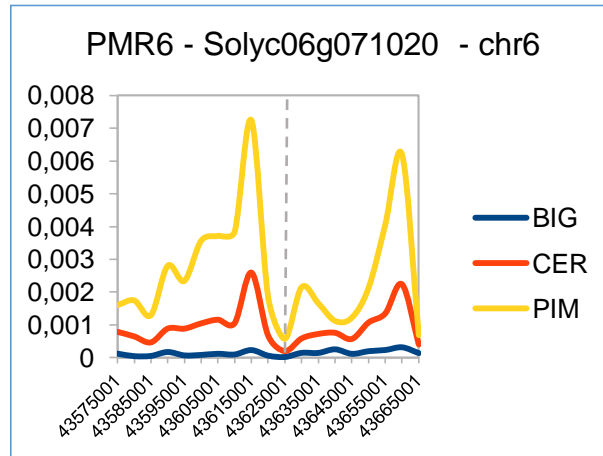

**Figure S2.** Nucleotide Diversity Analysis of S-Genes around Deleterious SNPs in PIM, CER, and BIG Groups. The genetic variation around of S alleles was analysed using the nucleotide diversity ( $\pi$ ) index implemented in vcfTools (<https://vcftools.github.io>), among different tomato groups (PIM, CER, and BIG), focusing on a 100kb region, centered around each deleterious SNP with a 5k window
