# Supplementary material for: Genomic Analysis Highlights Putative Defective Susceptibility Genes in Tomato Germplasm
Source: Plants (Basel). 2023 Jun 12;12(12):2289. doi: 10.3390/plants12122289 (PMC10300993; doi:10.3390/plants12122289)
Supplement: Supplementary file 1 [file plants-12-02289-s001.zip]

Archive with 4 entries (4 files):
- plants-2347108-Figure S1.pdf
- plants-2347108-Figure S2.pdf
- plants-2347108-Figure S3.pdf
- plants-2347108-Table S.xlsx
