# Supplementary material for: Genomic Analysis Highlights Putative Defective Susceptibility Genes in Tomato Germplasm
Source: Plants (Basel). 2023 Jun 12;12(12):2289. doi: 10.3390/plants12122289 (PMC10300993; doi:10.3390/plants12122289)
Supplement: Supplementary file 1 [file plants-12-02289-s001.zip › plants-2347108-Table S.xlsx]

## Sheet: Table S1 - S-genes
Acc. Number	ITAG 2.5	Name	function
O48814	Solyc10g084770	BIK1	Serine/threonine-protein kinase	OS=Arabidopsis thaliana
Q9LV85	Solyc04g054170	CPR5	Constitutive expresser of pathogenesis-related 5	OS=Arabidopsis thaliana
Q8L7R2	Solyc04g008760	DMR1	Homoserine kinase	OS=Arabidopsis thaliana
A0A178UM31	Solyc03g080190	DMR6	Plant invertase/pectin methylesterase inhibitor superfamily protein	OS=Arabidopsis thaliana
O65718	Solyc02g088560	DND1/CNGC2	Cyclic nucleotide-gated	OS=Arabidopsis thaliana
A0A097KYB3	Solyc04g049090	MLO1	MLO-like protein	OS=Solanum melongena
Q9ZT82	Solyc07g053980	PMR4	Callose synthase	OS=Arabidopsis thaliana
Q9LUZ6	Solyc06g082070	PMR5	Pectate lyase	OS=Arabidopsis thaliana
A0A178VCI0	Solyc11g008140	PMR6	Pectate lyase	OS=Arabidopsis thaliana
A0A178VUE5	Solyc01g105230	SR1	calmodulin-binding protein	OS=Arabidopsis thaliana

## Sheet: Table S2 - Accessions
Individual code	Individual code	Group	TGRC	PI CGN#	EA #	Name	Botanical variety	Categories
TS-14	TS-014	PIM	LA1547	-	-	Chota to EI Angel	S. pimpinellifolium	Wild species
TS-15	TS-015	PIM	LA2093	-	-		S. pimpinellifolium	Wild species
TS-16	TS-016	PIM	LA1246	PI365912	-		S. pimpinellifolium	Wild species
TS-17	TS-017	PIM	LA0373	-	-	Culebras	S. pimpinellifolium	Wild species
TS-18	TS-018	PIM	LA1579	-	-		S. pimpinellifolium	Wild species
TS-19	TS-019	PIM	LA1589	PI407545	EA01467		S. pimpinellifolium	Wild species
TS-20	TS-020	PIM	LA0442	-	-	Sechin	S. pimpinellifolium	Wild species
TS-21	TS-021	PIM	LA1375	PI365967	-		S. pimpinellifolium	Wild species
TS-22	TS-022	PIM	LA1269	PI365957	-	Pisiquillo	S. pimpinellifolium	Wild species
TS-23	TS-023	PIM	LA1521	-	-	EI Pinon, Asia	S. pimpinellifolium	Wild species
TS-24	TS-024	PIM	-	-	-		S. pimpinellifolium	Wild species
TS-50	TS-050	PIM	LA0417	-	EA00565		S. pimpinellifolium	Wild species
TS-77	TS-077	PIM	LA1237	PI365910	-	Atacames	S. pimpinellifolium	Wild species
TS-79	TS-079	PIM	LA1924	-	-	Piedras Gordas	S. pimpinellifolium	Wild species
TS-92	TS-092	PIM	LA1582	PI407539	-	Punto Cuatro	S. pimpinellifolium	Wild species
TS-123	TS-123	PIM	LA0722	-	-	Trujillo	S. pimpinellifolium	Wild species
TS-124	TS-124	PIM	LA1245	PI365911	-	Santa Rosa	S. pimpinellifolium	Wild species
TS-144	TS-144	PIM	LA0411	PI251319	-	Pichilingue	S. pimpinellifolium	Wild species
TS-145	TS-145	PIM	LA1617	-	-	Tumbes south	S. pimpinellifolium	Wild species
TS-156	TS-156	PIM	LA2181	-	-	Balsa Huaico	S. pimpinellifolium	Wild species
TS-164	TS-164	PIM	LA1584	PI407541	-	Jayanca to La Vina	S. pimpinellifolium	Wild species
TS-182	TS-182	PIM	LA2183	-	-	Corral Quemado	S. pimpinellifolium	Wild species
TS-222	TS-222	PIM	-	-	-	Wva 700	S. pimpinellifolium	Wild species
TS-244	TS-244	PIM	LA1578	-	-	Santa Marta	S. pimpinellifolium	Wild species
TS-265	TS-265	PIM	LA0400	-	-	Hacienda Buenos Aires	S. pimpinellifolium	Wild species
TS-266	TS-266	PIM	LA1478	-	-	Santo Tome	S. pimpinellifolium	Wild species
TS-267*	TS-267	PIM	LA2660	-	-	San Ignacia de Moxos	S. pimpinellifolium	Wild species
TS-291	TS-291	PIM	LA1589	PI407545	EA01467	Viru to Galumga	S. pimpinellifolium	Wild species
TS-410	TS-410	PIM	-	PI370093	-		S. pimpinellifolium	Wild species
TS-411	TS-411	PIM	LA0480	-	-		S. pimpinellifolium	Wild species
TS-412	TS-412	PIM	LA0722	-	-		S. pimpinellifolium	Wild species
TS-413	TS-413	PIM	LA1242	-	-		S. pimpinellifolium	Wild species
TS-414	TS-414	PIM	LA1341	PI379020	-		S. pimpinellifolium	Wild species
TS-415	TS-415	PIM	LA1596	PI407552	-		S. pimpinellifolium	Wild species
TS-416	TS-416	PIM	LA1847	-	-		S. pimpinellifolium	Wild species
TS-417	TS-417	PIM	LA1933	-	-		S. pimpinellifolium	Wild species
TS-418	TS-418	PIM	LA2147	-	-		S. pimpinellifolium	Wild species
TS-419	TS-419	PIM	LA2173	-	-		S. pimpinellifolium	Wild species
TS-420	TS-420	PIM	LA2184	-	-		S. pimpinellifolium	Wild species
TS-421	TS-421	PIM	LA2187	-	-		S. pimpinellifolium	Wild species
TS-422	TS-422	PIM	LA2425	-	-		S. pimpinellifolium	Wild species
TS-424	TS-424	PIM	-	PI126947	-		S. pimpinellifolium	Wild species
TS-425	TS-425	PIM	-	PI126925	-		S. pimpinellifolium	Wild species
TS-429	TS-429	PIM	-	PI126954	-		S. pimpinellifolium	Wild species
TS-432	TS-432	PIM	-	PI270449	-		S. pimpinellifolium	Wild species
TS-433	TS-433	PIM	-	PI370093	-		S. pimpinellifolium	Wild species
TS-434	TS-434	PIM	LA1591	PI407547	-	SAL1871	S. pimpinellifolium	Wild species
TS-435	TS-435	PIM	LA1595	PI407551	-	SAL1875	S. pimpinellifolium	Wild species
TS-437	TS-437	PIM	LA1578	-	-	SAL1858	S. pimpinellifolium	Wild species
TS-438	TS-438	PIM	-	-	-	CN7542	S. pimpinellifolium	Wild species
TS-439	TS-439	PIM	LA2656	PI503524	-		S. pimpinellifolium	Wild species
TS-440	TS-440	PIM	LA2857	-	-		S. pimpinellifolium	Wild species
TS-441	TS-441	PIM	LA4431	-	-		S. pimpinellifolium	Wild species
TS-13	TS-013	CER	-	-	-	Pime-Bruce	S. pimpinellifolium	Wild species
TS-25	TS-025	CER	-	-	-	Clémentine	S. lycopersicum var cerasiforme	cultivar
TS-26	TS-026	CER	-	-	-		S. lycopersicum var cerasiforme	cultivar
TS-27	TS-027	CER	-	-	-	N135 Green Gage	S. lycopersicum var cerasiforme	cultivar
TS-28	TS-028	CER	-	-	-	N 347 Yablochnyi	S. lycopersicum var cerasiforme
TS-29	TS-029	CER	-	-	-		S. lycopersicum var cerasiforme	cultivar
TS-30	TS-030	CER	LA1204	-	-		S. lycopersicum var cerasiforme	Wild species
TS-31	TS-031	CER	LA1464	-	-		S. lycopersicum var cerasiforme	Wild species
TS-32	TS-032	CER	LA0172	-	-	Santa Cruz	S. lycopersicum var cerasiforme	Latin American cultivar
TS-33	TS-033	CER	LA2137	-	-		S. lycopersicum var cerasiforme	Wild species
TS-34	TS-034	CER	LA2675	-	-		S. lycopersicum var cerasiforme	Wild species
TS-35	TS-035	CER	-	-	-	tomate Richters	S. lycopersicum var cerasiforme	uncertain
TS-36	TS-036	CER	-	PI187002-1	-		S. lycopersicum var cerasiforme	cultivar
TS-37	TS-037	CER	-	-	-	L. pimpinellifolium atypique, site 10 (F300045)	S. lycopersicum var cerasiforme	Wild Species
TS-38	TS-038	CER	-	PI129088	-		S. lycopersicum var cerasiforme	cultivar
TS-39	TS-039	CER	-	-	-	Cerise Gold	S. lycopersicum var cerasiforme	cultivar
TS-40	TS-040	CER	-	-	-	Cerise VFNT	S. lycopersicum var cerasiforme	cultivar
TS-53	TS-053	CER	LA2095	-	-		S. lycopersicum var cerasiforme	Wild species
TS-54	TS-054	CER	-	-	-	cerise rose	S. lycopersicum var cerasiforme	cultivar
TS-56	TS-056	CER	LA1320	PI365923	-		S. lycopersicum var cerasiforme	Wild species
TS-57	TS-057	CER	LA1307	PI378998	-		S. lycopersicum var cerasiforme	Wild species
TS-61	TS-061	CER	LA2670	-	-	Huayvaruni	S. lycopersicum var cerasiforme	Wild species
TS-62	TS-062	CER	-	-	EA02959
TS-63	TS-063	CER	-	-	-
TS-64	TS-064	CER	-	-	EA03525			Cocktail tomato
TS-65	TS-065	CER	LA1482	-	-		S. lycopersicum var cerasiforme	Wild species
TS-66	TS-066	CER	LA1388	PI379009	-	H707	S. lycopersicum var cerasiforme	Wild species
TS-67	TS-067	CER	-	-	EA02304			Cocktail tomato
TS-70	TS-070	CER	-	-	-	Pyriforme	S. lycopersicum var cerasiforme	cultivar
TS-71	TS-071	CER	-	-	-	Ohmiya SunCerise	S. lycopersicum var cerasiforme	cultivar
TS-72	TS-072	CER	-	-	-	Principe Borghese		Vintage cultivar
TS-75	TS-075	CER	-	-	-	Poire jaune	S. lycopersicum var cerasiforme	cultivar
TS-83*	TS-083	CER	-	-	EA01953		S. lycopersicum var cerasiforme	cultivar
TS-84	TS-084	CER	-	-	-
TS-87	TS-087	CER	LA1701	-	-	Trujillo	S. lycopersicum var cerasiforme	Latin American cultivar; Wild species
TS-91	TS-091	CER	-	-	-	N 2759 Enano	S. lycopersicum var cerasiforme	cultivar
TS-94	TS-094	CER	-	-	-	Farthest North	S. lycopersicum var cerasiforme	cultivar
TS-96	TS-096	CER	LA1456	-	-		S. lycopersicum var cerasiforme	Wild species
TS-97	TS-097	CER	LA0154	-	-	Tiny tim	S. lycopersicum var cerasiforme
TS-98	TS-098	CER	LA4355	-	-	Gold Nugget	S. lycopersicum var cerasiforme	cultivar
TS-99	TS-099	CER	-	-	-	Celsior	S. lycopersicum var cerasiforme
TS-105	TS-105	CER	-	-	EA01448		S. lycopersicum var cerasiforme	Wild species
TS-106	TS-106	CER	-	-	-		S. lycopersicum var cerasiforme	cultivar
TS-107	TS-107	CER	LA1542	-	-	Turrialba	S. lycopersicum var cerasiforme	Wild species
TS-109	TS-109	CER	-	-	EA02660			Cocktail tomato
TS-116	TS-116	CER	-	-	-	N1565	S. lycopersicum var cerasiforme	cultivar
TS-118	TS-118	CER	LA0292	-	-	Santa Cruz, Galapagos	S. lycopersicum var cerasiforme	Latin American cultivar;Wild species
TS-119*	TS-119	CER	-	-	-	Wva 106	S. lycopersicum var cerasiforme	Wild species
TS-120	TS-120	CER	-	-	EA01356
TS-129	TS-129	CER	LA2845	-	-	Moyobamba	S. lycopersicum var cerasiforme	Latin American cultivar; Wild species
TS-131*	TS-131	CER	LA1162	-	-	Cuba Plum	S. lycopersicum var cerasiforme	cultivar
TS-134	TS-134	CER	LA1429	-	-	La Estancilla	S. lycopersicum var cerasiforme	Wild species
TS-138	TS-138	CER	-	-	-	Malintka 101		cultivar
TS-148	TS-148	CER	LA1323	PI365924	-	Pfacchayoc	S. lycopersicum var cerasiforme	Wild species
TS-149	TS-149	CER	LA1425	PI379060	-	Villa Hermosa	S. lycopersicum var cerasiforme	Latin American cultivar
TS-154	TS-154	CER	LA1623	-	-	Muna	S. lycopersicum var cerasiforme	Wild species
TS-158	TS-158	CER	LA2626	-	EA01541	PE-67	S. lycopersicum var cerasiforme	Wild species
TS-165	TS-165	CER	LA1218	-	-	Veracruz	S. lycopersicum var cerasiforme	Latin American cultivar
TS-181	TS-181	CER	LA1457	-	EA01438		S. lycopersicum var cerasiforme	Wild species
TS-187	TS-187	CER	-	-	-	Monplaisir	S. lycopersicum var cerasiforme	cultivar
TS-189	TS-189	CER	-	-	-	Nagcarlang		cultivar
TS-202	TS-202	CER	LA2402	-	-		S. lycopersicum var cerasiforme	Latin American cultivar
TS-205	TS-205	CER	-	-	-	8 bis	S. lycopersicum var cerasiforme	cultivar
TS-209	TS-209	CER	-	-	-	Da serbo		landrace
TS-213	TS-213	CER	-	-	EA01784
TS-216	TS-216	CER	-	-	-	Phyra	S. lycopersicum var cerasiforme	cultivar
TS-219	TS-219	CER	-	-	-	Mobalcon		landrace
TS-221	TS-221	CER	LA1569	-	-	Jalapa	S. lycopersicum var cerasiforme	Wild species
TS-223	TS-223	CER	LA2675	-	EA01557		S. lycopersicum var cerasiforme	Wild species
TS-227	TS-227	CER	-	-	-	Atom	S. lycopersicum var cerasiforme	cultivar
TS-229	TS-229	CER	LA1620	-	-		S. lycopersicum var cerasiforme	Wild species
TS-230	TS-230	CER	-	-	-	Cerise Ildi	S. lycopersicum var cerasiforme	cultivar
TS-231	TS-231	CER	-	-	-	L 285	S. lycopersicum var cerasiforme	cultivar
TS-233	TS-233	CER	LA1218	-	EA00602		S. lycopersicum var cerasiforme	Latin American cultivar
TS-238	TS-238	CER	LA1228	PI379047	-	Macas	S. lycopersicum var cerasiforme	Wild species
TS-240	TS-240	CER	LA3136	-	-	Arroyo Rico	S. lycopersicum var cerasiforme	Wild species
TS-243	TS-243	CER	-	-	EA04228
TS-247	TS-247	CER	-	-	-	N 795 Pescio	S. lycopersicum var cerasiforme	cultivar
TS-248	TS-248	CER	-	-	-
TS-250	TS-250	CER	-	-	EA03539
TS-252	TS-252	CER	-	-	EA01802			cocktail tomato
TS-254	TS-254	CER	-	-	EA02979
TS-257	TS-257	CER	-	-	-	Marpha N2	S. lycopersicum var cerasiforme	cultivar
TS-258	TS-258	CER	-	-	-	Minibel	S. lycopersicum var cerasiforme	cultivar
TS-260	TS-260	CER	-	-	-	Cerise Orange dUzès	S. lycopersicum var cerasiforme	cultivar
TS-262	TS-262	CER	LA1247	PI379058	EA01403		S. lycopersicum var cerasiforme	Wild species
TS-271	TS-271	CER	-	-	-	Linosa		landrace
TS-273	TS-273	CER	LA2640	-	EA01545	PE-63	S. lycopersicum var cerasiforme	Wild species
TS-280	TS-280	CER	-	-	-	Cerise du sud ouest N 2	S. lycopersicum var cerasiforme	Wild species
TS-281	TS-281	CER	LA1286	PI365920	-	San Martin de Pangoa	S. lycopersicum var cerasiforme	Wild species
TS-283	TS-283	CER	-	-	-	Cisterno	S. lycopersicum var cerasiforme	cultivar
TS-284	TS-284	CER	-	-	-	Cerazjnho		landrace
TS-286	TS-286	CER	-	-	-	Allungato piccolo		landrace
TS-287	TS-287	CER	-	-	EA00915			Cocktail tomato
TS-289*	TS-289	CER	LA1244	PI379044	EA00610		S. lycopersicum var cerasiforme	Latin American cultivar
TS-290	TS-290	CER	-	-	-	N 2257 Dikorastushii...	S. lycopersicum var cerasiforme	cultivar
TS-294	TS-294	CER	-	-	-	N 933	S. lycopersicum var cerasiforme	cultivar
TS-295*	TS-295	CER	LA0417	-	-	Puna	S. lycopersicum var cerasiforme	Latin American cultivar; Wild species
TS-298	TS-298	CER	LA2308	-	-	San Francisco	S. lycopersicum var cerasiforme	Wild species
TS-299	TS-299	CER	LA2131	-	-	Bomboiza	S. lycopersicum var cerasiforme	Wild species
TS-300	TS-300	CER	LA1231	PI379049	-	Tena	S. lycopersicum var cerasiforme	Wild species
TS-301	TS-301	CER	LA2688	-	-	Santa Cruz near Shintuyo	S. lycopersicum var cerasiforme	Wild species
TS-302	TS-302	CER	LA1543	-	-	Upper Parana	S. lycopersicum var cerasiforme	Wild species
TS-303	TS-303	CER	LA1461	-	-	Los Banos	S. lycopersicum var cerasiforme	Wild species
TS-304*	TS-304	CER	LA2307	-	-	Tarapoto	S. lycopersicum var cerasiforme	Latin American cultivar
TS-423*	TS-423	CER	LA2840	-	-		S. lycopersicum var cerasiforme	Wild species
TS-426*	TS-426	CER	LA1263	PI365918	-	SAL345	S. lycopersicum var cerasiforme	cultivar
TS-427*	TS-427	CER	-	PI126933	-		S. lycopersicum var cerasiforme	cultivar
TS-428*	TS-428	CER	-	PI126953	-		S. lycopersicum var cerasiforme	cultivar
TS-430*	TS-430	CER	-	PI127807	-	BL 587-S	S. lycopersicum var cerasiforme	cultivar
TS-431*	TS-431	CER	-	PI127807	-	BL 587	S. lycopersicum var cerasiforme	cultivar
TS-436*	TS-436	CER	-	-	-	BL 359	S. lycopersicum var cerasiforme	cultivar
TS-1	TS-001	BIG	LA0490	-	-	VF-36	S. lycopersicum	Vintage Processing
TS-2	TS-002	BIG	LA2706	-	-	Moneymaker	S. lycopersicum	Vintage Fresh Market
TS-3#	TS-003	BIG	LA3475	-	-	M-82	S. lycopersicum	Modern Processing
TS-4	TS-004	BIG	LA3856	-	-	Hawaii 7998	S. lycopersicum	Inbreed line
TS-5	TS-005	BIG	LA2711	-	-	Edkawi	S. lycopersicum	Vintage Fresh Market
TS-6	TS-006	BIG	LA3008	-	-	San Marzano	S. lycopersicum	Vintage Processing
TS-7	TS-007	BIG	LA3911	-	-	Micro-Tom	S. lycopersicum	Modern Fresh Market
TS-8#	TS-008	BIG	LA4024	-	-	E-6203	S. lycopersicum	Modern Processing
TS-9	TS-009	BIG	LA2838A	-	-	Ailsa Craig	S. lycopersicum	Vintage Fresh Market
TS-10	TS-010	BIG	LA0502	-	-	Marglobe	S. lycopersicum	Vintage Fresh Market
TS-11	TS-011	BIG	-	-	-	KR2	S. lycopersicum	Modern Fresh Market
TS-12	TS-012	BIG	-	-	-	yoku improvement	S. lycopersicum	Modern Fresh Market
TS-41	TS-041	BIG	-	-	EA02435		S. lycopersicum	Cocktail tomato
TS-42	TS-042	BIG	-	PI345565	EA05808		S. lycopersicum	Processing tomato
TS-43	TS-043	BIG	-	-	EA00840	Moneymaker	S. lycopersicum	Fresh Market
TS-44	TS-044	BIG	-	-	-	A pera abruzzese		Landrace
TS-45#	TS-045	BIG	-	PI303718	EA05578		S. lycopersicum	Processing tomato
TS-46	TS-046	BIG	-	-	EA01237			Processing tomato
TS-47	TS-047	BIG	-	-	EA01960		S. lycopersicum	Processing tomato
TS-48	TS-048	BIG	LA0146	-	-	Mexico City	S. lycopersicum	Landrace/Latin American cultivar
TS-49	TS-049	BIG	LA3238	-	-	Earliana	S. lycopersicum	Vintage Processing
TS-51	TS-051	BIG	-	-	-
TS-52	TS-052	BIG	-	-	-	05-4126 (97-49-2)		cultivar
TS-55	TS-055	BIG	-	-	EA00448
TS-58	TS-058	BIG	-	-	EA03577		S. lycopersicum	Processing tomato
TS-59#	TS-059	BIG	-	-	EA02898			Processing tomato
TS-60	TS-060	BIG	LA2009	-	-	New Yorker	S. lycopersicum	Vintage Fresh Market
TS-68	TS-068	BIG	LA0395	-	-	Chiclayo	S. lycopersicum	Latin American cultivar
TS-69	TS-069	BIG	LA1459	-	-	Huachinango	S. lycopersicum	Latin American cultivar
TS-73†	TS-073	BIG	-	-	-	Quarantino
TS-74	TS-074	BIG	-	-	-	N 739	S. lycopersicum	Fresh Market
TS-76	TS-076	BIG	-	-	EA01230			Processing tomato
TS-78#	TS-078	BIG	-	-	EA02895		S. lycopersicum	Processing tomato
TS-80	TS-080	BIG	-	-	EA01020			Processing tomato
TS-81	TS-081	BIG	-	-	EA02761			Processing tomato
TS-82	TS-082	BIG	-	-	EA03274			Processing tomato
TS-85#	TS-085	BIG	-	-	-
TS-86	TS-086	BIG	-	-	EA01684
TS-88	TS-088	BIG	-	-	EA01804		S. lycopersicum	Cocktail tomato
TS-89	TS-089	BIG	-	-	EA01185			Processing tomato
TS-90	TS-090	BIG	-	-	EA02753		S. lycopersicum	Cocktail tomato
TS-93	TS-093	BIG	-	-	EA01002			Processing tomato
TS-95	TS-095	BIG	-	-	-	Moneymaker	S. lycopersicum	Fresh Market
TS-100	TS-100	BIG	-	-	EA03456		S. lycopersicum	Processing
TS-101	TS-101	BIG	-	-	EA00369		S. lycopersicum
TS-102	TS-102	BIG	-	-	EA03673		S. lycopersicum	Processing tomato
TS-103	TS-103	BIG	-	-	EA00389		S. lycopersicum
TS-104	TS-104	BIG	-	-	EA01756		S. lycopersicum	Processing tomato
TS-108#	TS-108	BIG	-	-	EA01989	Puno I	S. lycopersicum	Processing tomato
TS-110	TS-110	BIG	-	PI93302	EA04243		S. lycopersicum
TS-111	TS-111	BIG	-	-	EA01270			Processing tomato
TS-112	TS-112	BIG	-	-	EA03083		S. lycopersicum	Processing tomato
TS-113	TS-113	BIG	-	-	EA01198			Processing tomato
TS-114	TS-114	BIG	-	-	EA01982		S. lycopersicum	Processing tomato
TS-115	TS-115	BIG	-	-	EA03426			Processing tomato
TS-117	TS-117	BIG	-	-	-	Scatolone di bolsena		Landrace
TS-121	TS-121	BIG	LA3846	-	-	NC EBR-6	S. lycopersicum	Modern Fresh Market
TS-122	TS-122	BIG	LA1090	-	-	Rutgers	S. lycopersicum	Vintage Fresh Market
TS-125	TS-125	BIG	-	-	EA00422			Processing tomato
TS-126	TS-126	BIG	-	-	EA01903		S. lycopersicum
TS-127	TS-127	BIG	LA0113	-	-	Hacienda Calera	S. lycopersicum	Landrace/Latin American cultivar
TS-128	TS-128	BIG	LA0012	-	-	Pearson	S. lycopersicum	Vintage Processing
TS-130	TS-130	BIG	LA2413	-	-	Severianin	S. lycopersicum	Modern Fresh Market
TS-132	TS-132	BIG	LA3903	-	-	Primabel	S. lycopersicum	Vintage Fresh Market
TS-133#	TS-133	BIG	LA3528	-	-	Peto95-43	S. lycopersicum	Modern Processing
TS-135	TS-135	BIG	LA0466	PI 258469	-	Hacienda Rosario	S. lycopersicum	Landrace/Latin American cultivar
TS-136	TS-136	BIG	-	-	-	Vito
TS-137	TS-137	BIG	-	-	-	Spagnoletta		Landrace
TS-139	TS-139	BIG	-	-	-	Red Setter		Vintage cultivar
TS-140	TS-140	BIG	-	-	-	149-77		cultivar
TS-141	TS-141	BIG	-	-	-	Saladette		cultivar
TS-142	TS-142	BIG	-	-	-	Roma		Vintage cultivar
TS-143	TS-143	BIG	LA4025	-	-	Florida 7547	S. lycopersicum	Modern Fresh Market
TS-147#	TS-147	BIG	-	-	-
TS-150	TS-150	BIG	LA2285	-	-	Tarapoto	S. lycopersicum	Landrace/Latin American cultivar
TS-151	TS-151	BIG	LA2399	-	-	T-5	S. lycopersicum	Modern Fresh Market
TS-152	TS-152	BIG	LA1021	-	-	Santa Cruz B	S. lycopersicum	Landrace/Latin American cultivar
TS-153	TS-153	BIG	LA1544	-	-	Xol Languna	S. lycopersicum	Landrace/Latin American cultivar
TS-155	TS-155	BIG	LA0533	-	-	Condine Red	S. lycopersicum	Vintage Fresh Market,Monogenic
TS-157	TS-157	BIG	-	-	EA03648		S. lycopersicum	Processing tomato
TS-159	TS-159	BIG	-	-	EA03028			Processing tomato
TS-160	TS-160	BIG	-	-	EA03533		S. lycopersicum	Processing tomato
TS-161	TS-161	BIG	-	-	EA02586		S. lycopersicum	Processing tomato
TS-162#	TS-162	BIG	-	-	EA03463		S. lycopersicum	Processing tomato
TS-163	TS-163	BIG	LA1504	-	-	Marmande	S. lycopersicum	Vintage Fresh Market
TS-166	TS-166	BIG	LA0404	-	-	Piura	S. lycopersicum	Landrace/Latin American cultivar
TS-167	TS-167	BIG	LA0147	-	-	Tegucigalpa	S. lycopersicum	Landrace/Latin American cultivar
TS-168#	TS-168	BIG	-	-	-	Da appendere		Landrace
TS-169	TS-169	BIG	-	-	-	Cuor di bue di Albenga		Landrace
TS-170	TS-170	BIG	-	-	-	Cuor di bue		Landrace
TS-171#	TS-171	BIG	LA1706	-	-	UC-82	S. lycopersicum	Modern Processing
TS-172	TS-172	BIG	-	PI280060	EA05480		S. lycopersicum	Processing tomato
TS-173	TS-173	BIG	-	-	EA03611		S. lycopersicum
TS-174	TS-174	BIG	-	-	EA00304			Processing tomato
TS-175	TS-175	BIG	-	-	EA03586		S. lycopersicum	Processing tomato
TS-176	TS-176	BIG	-	-	EA02669			Processing tomato
TS-177	TS-177	BIG	-	-	EA01155			Processing tomato
TS-178	TS-178	BIG	-	PI513036	EA06485		S. lycopersicum	Processing tomato
TS-179	TS-179	BIG	-	-	EA01027			Processing tomato
TS-180	TS-180	BIG	-	-	EA02728			Processing tomato
TS-183	TS-183	BIG	-	-	EA02764			Processing tomato
TS-184†	TS-184	BIG	LA2283	-	-	Tarapoto	S. lycopersicum
TS-185	TS-185	BIG	LA4347	-	-	B-L-35	S. lycopersicum	Vintage Fresh Market
TS-186#	TS-186	BIG	LA3214	-	-	Rowpac	S. lycopersicum	Modern Processing
TS-188	TS-188	BIG	LA1506	-	-	Stone	S. lycopersicum	Vintage Fresh Market
TS-190#	TS-190	BIG	-	-	-	Santa Chiara		cultivar
TS-191	TS-191	BIG	-	-	-	Francescano		Landrace
TS-192	TS-192	BIG	-	-	-	Severianin		Vintage cultivar
TS-193	TS-193	BIG	-	-	-	Pantano dArdea		Landrace
TS-194	TS-194	BIG	-	-	-
TS-195	TS-195	BIG	LA0516	-	-	Ace	S. lycopersicum	Vintage Fresh Market
TS-196	TS-196	BIG	-	-	EA00240	N020212		Processing tomato
TS-197	TS-197	BIG	-	-	-	Libanese		Landrace
TS-198	TS-198	BIG	-	-	EA00512
TS-200	TS-200	BIG	LA3320	-	-	Hot set	S. lycopersicum	cultivar
TS-201	TS-201	BIG	LA1210	-	-	San Salvador	S. lycopersicum	Landrace/Latin American cultivar
TS-203	TS-203	BIG	-	-	-	Bell pepper-like		Landrace
TS-204	TS-204	BIG	LA3840	-	-	Florida 7060	S. lycopersicum	Modern Fresh Market
TS-206	TS-206	BIG	LA0089	-	-	Prince Borghese	S. lycopersicum	Vintage Fresh Market
TS-210	TS-210	BIG	LA3625	-	-	NC 265-1 (93)-3-3	S. lycopersicum	Modern Fresh Market
TS-211	TS-211	BIG	LA4354	-	-	NC 84173	S. lycopersicum	Modern Fresh Market
TS-212	TS-212	BIG	LA3242	-	-	Flora-Dade	S. lycopersicum	Modern Fresh Market
TS-214	TS-214	BIG	-	-	-	Panama		Landrace
TS-215	TS-215	BIG	-	-	-	Vrbikanske Nizke		cultivar
TS-218	TS-218	BIG	-	-	-	Santa Clara 5800		cultivar
TS-220	TS-220	BIG	-	-	-	Barnaulski Konservnyi		cultivar
TS-224	TS-224	BIG	LA0410	PI 258474	-	Guayaquil	S. lycopersicum	Landrace/Latin American cultivar
TS-225	TS-225	BIG	-	PI330336	EA05747		S. lycopersicum	Processing tomato
TS-226	TS-226	BIG	-	-	-	Microtom	S. lycopersicum	cultivar
TS-228#	TS-228	BIG	-	-	-	M-82	S. lycopersicum	cultivar
TS-232	TS-232	BIG	-	-	EA00951			Processing
TS-234	TS-234	BIG	-	-	EA01371			Processing tomato
TS-235	TS-235	BIG	-	-	EA00892			Processing tomato
TS-236	TS-236	BIG	-	-	EA02732			Processing tomato
TS-237	TS-237	BIG	LA3243	-	-	Platense	S. lycopersicum	Vintage Fresh Market
TS-239	TS-239	BIG	LA3845	-	-	NC EBR-5	S. lycopersicum	Modern Fresh Market
TS-241	TS-241	BIG	LA0126	-	-	Quito	S. lycopersicum	Latin American cultivar
TS-242	TS-242	BIG	LA0134C	-	-	Ayacucho	S. lycopersicum	Latin American cultivar
TS-245#	TS-245	BIG	-	-	EA03126		S. lycopersicum	Processing tomato
TS-246	TS-246	BIG	-	-	EA00983			Processing tomato
TS-249	TS-249	BIG	LA1462	-	-	Merida	S. lycopersicum	Landrace/Latin American cultivar
TS-251	TS-251	BIG	-	PI647249	EA04001		S. lycopersicum
TS-253#	TS-253	BIG	LA4345	-	-	Heinz 1706-BG	S. lycopersicum	Modern Processing
TS-255	TS-255	BIG	-	-	EA03002			Processing tomato
TS-256	TS-256	BIG	LA2260		EA00744		S. lycopersicum	Latin American cultivar
TS-259	TS-259	BIG	-	-	EA01712			Processing tomato
TS-261*	TS-261	BIG	LA1511	-	EA01444		S. lycopersicum	Wild species
TS-263#	TS-263	BIG	LA3343	-	-	Rio Grande	S. lycopersicum	Processing tomato
TS-264	TS-264	BIG	LA0025	-	-	King Humbert #1	S. lycopersicum	Vintage Fresh Market
TS-268	TS-268	BIG	-	-	EA01915		S. lycopersicum	cultivar
TS-269	TS-269	BIG	-	-	-	Canestrino		Landrace
TS-270	TS-270	BIG	-	-	EA03174
TS-272#	TS-272	BIG	-	-	EA06878			Processing tomato
TS-274#	TS-274	BIG	-	-	EA03613			Cocktail/Processing tomato
TS-275	TS-275	BIG	-	-	EA01049			Processing tomato
TS-276	TS-276	BIG	-	-	EA03650			Cocktail/Processing tomato
TS-277#	TS-277	BIG	LA3144	-	-	Hunt100	S. lycopersicum	Modern Processing
TS-278	TS-278	BIG	LA0517	-	-	Early Santa Clara	S. lycopersicum	Vintage Processing
TS-282*	TS-282	BIG	-	-	-	Ucra2		Landrace
TS-285	TS-285	BIG	-	PI303752	EA05612		S. lycopersicum	Processing tomato
TS-288	TS-288	BIG	-	-	EA04236		S. lycopersicum	Processing tomato
TS-292#	TS-292	BIG	-	-	EA06902		S. lycopersicum	Processing tomato
TS-293	TS-293	BIG	-	-	EA03439		S. lycopersicum	Cocktail/Processing tomato
TS-296	TS-296	BIG	-	-	-	Droplet	S. lycopersicum
TS-297	TS-297	BIG	-	PI291344	EA05550		S. lycopersicum
TS-400	TS-400	BIG	-	-	-		S. lycopersicum	inbred line
TS-401	TS-401	BIG	-	-	-		S. lycopersicum	inbred line
TS-409	TS-409	BIG	-	PI124161	-		S. lycopersicum	Landrace
TS-305	TS-305	F1	-	-	-		S. lycopersicum	Fresh Market
TS-306	TS-306	F1	-	-	-		S. lycopersicum	Fresh Market
TS-307	TS-307	F1	-	-	-		S. lycopersicum	Fresh Market
TS-308	TS-308	F1	-	-	-		S. lycopersicum	Fresh Market
TS-309	TS-309	F1	-	-	-		S. lycopersicum	Fresh Market
TS-310	TS-310	F1	-	-	-		S. lycopersicum	Fresh Market
TS-311	TS-311	F1	-	-	-		S. lycopersicum	Fresh Market
TS-312	TS-312	F1	-	-	-		S. lycopersicum	Fresh Market
TS-313	TS-313	F1	-	-	-		S. lycopersicum	Fresh Market
TS-314	TS-314	F1	-	-	-		S. lycopersicum	Fresh Market
TS-315	TS-315	F1	-	-	-		S. lycopersicum	Fresh Market
TS-316	TS-316	F1	-	-	-		S. lycopersicum	Fresh Market
TS-317	TS-317	F1	-	-	-		S. lycopersicum	Processing
TS-318	TS-318	F1	-	-	-		S. lycopersicum	Processing
TS-319	TS-319	F1	-	-	-		S. lycopersicum	Processing
TS-320	TS-320	F1	-	-	-		S. lycopersicum	Processing
TS-321	TS-321	F1	-	-	-		S. lycopersicum	Processing
TS-146	TS-146	wild	LA2133	-	-		S. neorickii
TS-208	TS-208	wild	LA0528	-	-	Santa Cruz: Academy Bay	S. galapagense
TS-199	TS-199	wild	LA0746	-	EA00587		S. cheesmaniae
TS-207	TS-207	wild	LA1037	-	-		S. cheesmaniae
TS-217	TS-217	wild	LA0429	-	EA00568		S. cheesmaniae
TS-402	TS-402	wild	-	PI126935	-		S. peruvianum
TS-403	TS-403	wild	-	PI128650	-		S. peruvianum
TS-404	TS-404	wild	-	PI128657	-		S. peruvianum
TS-408	TS-408	wild	LA1969	-	-		S. chilense
TS-407	TS-407	wild	-	PI247087	-		S. habrochaites
Data from in Lin et al. [37]

## Sheet: Table S3 - Primer
gene		chr	position	REF	ALT	protein effect	primer for	primer rev	Chiclayo	E-6203	VF-36	Micro-Tom	Droplet	GPT166090	M-82	Edkawi	Puno I	Barnaulski Konservnyi
DMR1	Solyc04g008760	4	2414006	CC	TT	STOP gained	ATGGAGGGAGTGAAGAAGGC	GGTAGAGTGTACGCAGACCA	TT	-	-	TT*	-	TT	-	CT**	-	TT
BIK1	Solyc05g024290	5	31013858	AA	TT	STOP gained	ACGTCCAGTGATAAGCTCCA	GCAGAATTTTGTGGCTCTTGG	-	TT	-	-	-	-	TT	-	TT	-
DMR6	Solyc03g080190	3	52083445	AA	GG	STOP lost	AGGAGCATACTTCTCTAGAGGAT	TCGGAAGTGGTCGATTGTGA	-	-	-	GG	-	-	-	-	-	-
PMR6	Solyc03g111690	3	62344382	CC	TT	STOP gained	TGTGGATTATTTTCGCGAGGG	TGGCATTCTTTGGACAAGACC	-	-	-	TT	-	-	-	-	-	-
BIK1	Solyc04g050970	4	49186199	GG	AA	STOP gained	TCCTTGTGTTCCTGTCCTGT	CATCCTTCCTCCTCACCACA	GA	-	-	-	AA	-	AA	-	-	-
MLO1	Solyc02g077570	2	42468063	GG	TT	intron-variant	TAGCTGCTTTTCTCATCGCG	CAATGTCCAACTCAAGCTACGT	-	-	-	-	TT*	-	-	-	-	-
MLO1	Solyc02g077570	2	42471760	GG	AA	STOP gained	ACCTTTTGTGCTGACGTGAC	GCTTACCGTTGTCCATGCAA	-	-	-	-	AA	-	-	-	-	-
PMR5	Solyc03g006220	3	852558	TT	AA	STOP lost	ACATCTTTGACATATCCACCACT	ACCGAACACACCATTAATGCA	-	-	-	-	-	AA*	-	-	-	-
BIK1	Solyc06g005500	6	527016	TT	GG	intron-variant	TGCAGTCTCCCAATTTGAAGAG	TCTGAACTTGCCTCAAATCTCA	-	-	-	-	-	-	-	GG	-	-
BIK1	Solyc01g008870	1	2892756	AA	GG	STOP lost/intron-variant	CATGAAGATGTGTGTGTTTTCCA	AGAGTTGCTATCGGGAAAACG	-	-	-	-	-	-	-	-	-	-

## Sheet: Table S4 - vcf data
Name		TGRC	PI CGN#	EA #	Name	Botanical variety	Categories						SL2.50	SL2.50	SL5.0 chr	SL5.0 coordinate						nt mutated	position in nt
Panama	TS-214	-	-	-	Panama	0	Landrace	homoz	TS-214	BIG	BIK1	Solyc06g083500	SL2.50ch06	48908349	6	51300743	T	A	stop_gained	c.136A>T	p.Lys46*	136/1303	0.186328
Panama					Panama			homoz	TS-214	BIG	BIK1	Solyc01g067400	SL2.50ch01	75887538	1	70943298	A	G	stop_lost	c.424T>C	p.Ter142Glnext*?	712/2051	0.347148
Panama					Panama			homoz	TS-214	BIG	BIK1	Solyc04g050970	SL2.50ch04	49186199	4	49682472	G	A	stop_gained	c.211C>T	p.Lys71*	453/2123	0.213377
Panama					Panama			homoz	TS-214	BIG	DMR6	Solyc03g080190	SL2.50ch03	52083445	3	48127261	A	G	stop_lost	c.229T>C	p.Ter77Glnext*?	349/1479	0.23597
Panama					Panama			homoz	TS-214	BIG	MLO1	Solyc06g082820	SL2.50ch06	48492973	6	50878972	T	C	stop_lost	c.1123T>C	p.Ter375Glnext*?	1225/1945	0.62982
Panama					Panama			homoz	TS-214	BIG	PMR4	Solyc07g056260	SL2.50ch07	64110648	7	64636062	A	C	stop_lost	c.828T>G	p.Ter276Trpext*?	984/5895	0.166921
Panama					Panama			heteroz	TS-214	BIG	MLO1	Solyc06g082820	SL2.50ch06	48490999	6	50878972	A	C	stop_lost	c.342A>C	p.Ter114Tyrext*?	444/1945	0.228278
N 739	TS-074	-	-	-	N 739	S. lycopersicum	Fresh Market	homoz	TS-074	BIG	BIK1	Solyc06g062920	SL2.50ch06	39717979	6	42181873	T	A	stop_lost	c.694T>A	p.Ter232Argext*?	818/1801	0.454192
N 739					N 739			homoz	TS-074	BIG	BIK1	Solyc01g008860	SL2.50ch01	2886129	1	2902342	A	G	stop_lost&splice_region_variant	c.1231T>C	p.Ter411Glnext*?	1231/1233	0.998378
N 739					N 739			homoz	TS-074	BIG	BIK1	Solyc01g067400	SL2.50ch01	75887538	1	70943298	A	G	stop_lost	c.424T>C	p.Ter142Glnext*?	712/2051	0.347148
N 739					N 739			homoz	TS-074	BIG	DMR1	Solyc04g008760	SL2.50ch04	2414006	4	2578746	C	T	stop_gained	c.1129C>T	p.Arg377*	1129/1134	0.995591
N 739					N 739			homoz	TS-074	BIG	DMR6	Solyc03g080190	SL2.50ch03	52083445	3	48127261	A	G	stop_lost	c.229T>C	p.Ter77Glnext*?	349/1479	0.23597
Rowpac	TS-186	LA3214	-	-	Rowpac	S. lycopersicum	Modern Processing	homoz	TS-186	BIG	BIK1	Solyc01g008860	SL2.50ch01	2886129	1	2902342	A	G	stop_lost&splice_region_variant	c.1231T>C	p.Ter411Glnext*?	1231/1233	0.998378
Rowpac					Rowpac			homoz	TS-186	BIG	BIK1	Solyc05g024290	SL2.50ch05	31013858	5	31311062	A	T	stop_gained	c.674T>A	p.Ser225*	911/1957	0.465508
Rowpac					Rowpac			homoz	TS-186	BIG	BIK1	Solyc04g050970	SL2.50ch04	49186199	4	49682472	G	A	stop_gained	c.211C>T	p.Lys71*	453/2123	0.213377
Rowpac					Rowpac			homoz	TS-186	BIG	MLO1	Solyc02g077570	SL2.50ch02	42468063	2	42781103	G	T	splice_donor_variant&intron_variant	c.380+1G>T
Rowpac					Rowpac			homoz	TS-186	BIG	PMR6	Solyc02g067450	SL2.50ch02	37648327	2	37982182	G	A	splice_donor_variant&intron_variant	c.721+2C>T
Micro-Tom	TS-007	LA3911	-	-	Micro-Tom	S. lycopersicum	Modern Fresh Market	homoz	TS-007	BIG	DMR1	Solyc04g008760	SL2.50ch04	2414006	4	2578746	C	T	stop_gained	c.1129C>T	p.Arg377*	1129/1134	0.995591
Micro-Tom					Micro-Tom			homoz	TS-007	BIG	DMR6	Solyc03g080190	SL2.50ch03	52083445	3	48127261	A	G	stop_lost	c.229T>C	p.Ter77Glnext*?	349/1479	0.23597
Micro-Tom					Micro-Tom			homoz	TS-007	BIG	PMR4	Solyc01g073750	SL2.50ch01	81135674	1	75931511	C	T	stop_gained	c.2791C>T	p.Arg931*	2926/5487	0.53326
Micro-Tom					Micro-Tom			homoz	TS-007	BIG	PMR6	Solyc03g111690	SL2.50ch03	62344382	3	58374107	C	T	stop_gained	c.658C>T	p.Gln220*	952/1844	0.516269
Guayaquil	TS-224	LA0410	PI 258474	-	Guayaquil	S. lycopersicum	Landrace/Latin American cultivar	homoz	TS-224	BIG	BIK1	Solyc06g083500	SL2.50ch06	48908349	6	51300743	T	A	stop_gained	c.136A>T	p.Lys46*	308/1653	0.186328
Guayaquil					Guayaquil			homoz	TS-224	BIG	BIK1	Solyc01g067400	SL2.50ch01	75887538	1	70943298	A	G	stop_lost	c.424T>C	p.Ter142Glnext*?	712/2051	0.347148
Guayaquil					Guayaquil			homoz	TS-224	BIG	BIK1	Solyc04g050970	SL2.50ch04	49186199	4	49682472	G	A	stop_gained	c.211C>T	p.Lys71*	453/2123	0.213377
Guayaquil					Guayaquil			homoz	TS-224	BIG	DMR1	Solyc04g008760	SL2.50ch04	2414006	4	2578746	C	T	stop_gained	c.1129C>T	p.Arg377*	1129/1134	0.995591
Droplet	TS-296	-	-	-	Droplet	S. lycopersicum	0	homoz	TS-296	BIG	BIK1	Solyc04g050970	SL2.50ch04	49186199	4	49682472	G	A	stop_gained	c.211C>T	p.Lys71*	453/2123	0.213377
Droplet					Droplet			homoz	TS-296	BIG	MLO1	Solyc02g077570	SL2.50ch02	42468063	2	42781103	G	T	splice_donor_variant&intron_variant	c.380+1G>T
Droplet					Droplet			homoz	TS-296	BIG	MLO1	Solyc02g077570	SL2.50ch02	42471760	2	42781103	G	A	stop_gained	c.899G>A	p.Trp300*	899/1128	0.796986
Droplet					Droplet			homoz	TS-296	BIG	PMR4	Solyc01g073750	SL2.50ch01	81135674	1	75931511	C	T	stop_gained	c.2791C>T	p.Arg931*	2926/5487	0.53326
0	TS-409	-	PI124161	-	0	S. lycopersicum	Landrace	homoz	TS-409	BIG	BIK1	Solyc01g008860	SL2.50ch01	2886129	1	2902342	A	G	stop_lost&splice_region_variant	c.1231T>C	p.Ter411Glnext*?	1231/1233	0.998378
0					1			homoz	TS-409	BIG	BIK1	Solyc01g067400	SL2.50ch01	75887538	1	70943298	A	G	stop_lost	c.424T>C	p.Ter142Glnext*?	712/2051	0.347148
0					2			homoz	TS-409	BIG	DMR1	Solyc04g008760	SL2.50ch04	2414006	4	2578746	C	T	stop_gained	c.1129C>T	p.Arg377*	1129/1134	0.995591
0					3			homoz	TS-409	BIG	PMR5	Solyc03g006220	SL2.50ch03	852558	3	939941	T	A	stop_lost	c.703T>A	p.Ter235Lysext*?	800/1288	0.621118
M-82	TS-003	LA3475	-	-	M-82	S. lycopersicum	Modern Processing	homoz	TS-003	BIG	BIK1	Solyc05g024290	SL2.50ch05	31013858	5	31311062	A	T	stop_gained	c.674T>A	p.Ser225*	911/1957	0.465508
M-82					M-82			homoz	TS-003	BIG	BIK1	Solyc04g050970	SL2.50ch04	49186199	4	49682472	G	A	stop_gained	c.211C>T	p.Lys71*	453/2123	0.213377
M-82					M-82			homoz	TS-003	BIG	PMR4	Solyc01g073750	SL2.50ch01	81135674	1	75931511	C	T	stop_gained	c.2791C>T	p.Arg931*	2926/5487	0.53326
Hawaii 7998	TS-004	LA3856	-	-	Hawaii 7998	S. lycopersicum	Inbreed line	homoz	TS-004	BIG	BIK1	Solyc06g005500	SL2.50ch06	527016	6	628831	T	G	splice_donor_variant&intron_variant	c.376+2T>G
Hawaii 7998					Hawaii 7999			homoz	TS-004	BIG	BIK1	Solyc04g050970	SL2.50ch04	49186199	4	49682472	G	A	stop_gained	c.211C>T	p.Lys71*	453/2123	0.213377
Hawaii 7998					Hawaii 8000			homoz	TS-004	BIG	DMR1	Solyc04g008760	SL2.50ch04	2414006	4	2578746	C	T	stop_gained	c.1129C>T	p.Arg377*	1129/1134	0.995591
KR2	TS-011	-	-	-	KR2	S. lycopersicum	Modern Fresh Market	homoz	TS-011	BIG	MLO1	Solyc02g077570	SL2.50ch02	42468063	2	42781103	G	T	splice_donor_variant&intron_variant	c.380+1G>T
KR2					KR3			homoz	TS-011	BIG	MLO1	Solyc02g077570	SL2.50ch02	42471760	2	42781103	G	A	stop_gained	c.899G>A	p.Trp300*	899/1128	0.796986
KR2					KR4			homoz	TS-011	BIG	PMR4	Solyc01g006350	SL2.50ch01	952385	1	2902342	T	C	start_lost	c.1A>G	p.Met1?	1/3672	0.000272331
KR2					KR5			heteroz	TS-011	BIG	BIK1	Solyc05g007050	SL2.50ch05	1640061	5	1717892	T	G	splice_donor_variant&intron_variant	c.519+2T>G
KR2					KR6			heteroz	TS-011	BIG	BIK1	Solyc08g077560	SL2.50ch08	61543477	8	63188998	C	T	stop_gained	c.493C>T	p.Gln165*	900/1896	0.474684
Hacienda Rosario	TS-135	LA0466	PI 258469	-	Hacienda Rosario	S. lycopersicum	Landrace/Latin American cultivar	homoz	TS-135	BIG	DMR1	Solyc04g008760	SL2.50ch04	2414006	4	2578746	C	T	stop_gained	c.1129C>T	p.Arg377*	1129/1134	0.995591
Hacienda Rosario					Hacienda Rosario			homoz	TS-135	BIG	DND1	Solyc02g088560	SL2.50ch02	50610274	2	51048996	A	T	stop_gained	c.983T>A	p.Leu328*	1187/2482	0.478243
Hacienda Rosario					Hacienda Rosario			homoz	TS-135	BIG	MLO1	Solyc02g077570	SL2.50ch02	42468063	2	42781103	G	T	splice_donor_variant&intron_variant	c.380+1G>T
Tarapoto	TS-150	LA2285	-	-	Tarapoto	S. lycopersicum	Landrace/Latin American cultivar	homoz	TS-150	BIG	BIK1	Solyc04g050970	SL2.50ch04	49186199	4	49682472	G	A	stop_gained	c.211C>T	p.Lys71*	453/2123	0.213377
Tarapoto					Tarapoto			homoz	TS-150	BIG	DMR1	Solyc04g008760	SL2.50ch04	2414006	4	2578746	C	T	stop_gained	c.1129C>T	p.Arg377*	1129/1134	0.995591
Tarapoto					Tarapoto			homoz	TS-150	BIG	DND1	Solyc02g088560	SL2.50ch02	50610274	2	51048996	A	T	stop_gained	c.983T>A	p.Leu328*	1187/2482	0.478243
Santa Chiara	TS-190	-	-	-	Santa Chiara	0	cultivar	homoz	TS-190	BIG	BIK1	Solyc05g024290	SL2.50ch05	31013858	5	31311062	A	T	stop_gained	c.674T>A	p.Ser225*	911/1957	0.465508
Santa Chiara					Santa Chiara			homoz	TS-190	BIG	BIK1	Solyc04g050970	SL2.50ch04	49186199	4	49682472	G	A	stop_gained	c.211C>T	p.Lys71*	453/2123	0.213377
Santa Chiara					Santa Chiara			homoz	TS-190	BIG	PMR4	Solyc01g073750	SL2.50ch01	81135674	1	75931511	C	T	stop_gained	c.2791C>T	p.Arg931*	2926/5487	0.53326
Hunt100	TS-277	LA3144	-	-	Hunt100	S. lycopersicum	Modern Processing	homoz	TS-277	BIG	BIK1	Solyc01g008860	SL2.50ch01	2886129	1	2902342	A	G	stop_lost&splice_region_variant	c.1231T>C	p.Ter411Glnext*?	1231/1233	0.998378
Hunt100					Hunt101			homoz	TS-277	BIG	BIK1	Solyc05g024290	SL2.50ch05	31013858	5	31311062	A	T	stop_gained	c.674T>A	p.Ser225*	911/1957	0.465508
Hunt100					Hunt102			homoz	TS-277	BIG	DMR1	Solyc04g008760	SL2.50ch04	2414006	4	2578746	C	T	stop_gained	c.1129C>T	p.Arg377*	1129/1134	0.995591
Edkawi	TS-005	LA2711	-	-	Edkawi	S. lycopersicum	Vintage Fresh Market	homoz	TS-005	BIG	BIK1	Solyc06g005500	SL2.50ch06	527016	6	628831	T	G	splice_donor_variant&intron_variant	c.376+2T>G
Edkawi					Edkawi			homoz	TS-005	BIG	DMR1	Solyc04g008760	SL2.50ch04	2414006	4	2578746	C	T	stop_gained	c.1129C>T	p.Arg377*	1129/1134	0.995591
Edkawi					Edkawi			heteroz	TS-005	BIG	BIK1	Solyc05g007050	SL2.50ch05	1640061	5	1717892	T	G	splice_donor_variant&intron_variant	c.519+2T>G
yoku improvement	TS-012	-	-	-	yoku improvement	S. lycopersicum	Modern Fresh Market	homoz	TS-012	BIG	MLO1	Solyc02g077570	SL2.50ch02	42468063	2	42781103	G	T	splice_donor_variant&intron_variant	c.380+1G>T
yoku improvement					yoku improvement			homoz	TS-012	BIG	MLO1	Solyc02g077570	SL2.50ch02	42471760	2	42781103	G	A	stop_gained	c.899G>A	p.Trp300*	899/1128	0.796986
yoku improvement					yoku improvement			heteroz	TS-012	BIG	BIK1	Solyc05g007050	SL2.50ch05	1640061	5	1717892	T	G	splice_donor_variant&intron_variant	c.519+2T>G
yoku improvement					yoku improvement			heteroz	TS-012	BIG	BIK1	Solyc08g077560	SL2.50ch08	61543477	8	63188998	C	T	stop_gained	c.493C>T	p.Gln165*	900/1896	0.474684
0	TS-078	-	-	EA02895	0	S. lycopersicum	Processing tomato	homoz	TS-078	BIG	BIK1	Solyc04g050970	SL2.50ch04	49186199	4	49682472	G	A	stop_gained	c.211C>T	p.Lys71*	453/2123	0.213377
0					0			homoz	TS-078	BIG	DMR1	Solyc04g008760	SL2.50ch04	2414006	4	2578746	C	T	stop_gained	c.1129C>T	p.Arg377*	1129/1134	0.995591
0	TS-089	-	-	EA01185	0	0	Processing tomato	homoz	TS-089	BIG	DMR1	Solyc04g008760	SL2.50ch04	2414006	4	2578746	C	T	stop_gained	c.1129C>T	p.Arg377*	1129/1134	0.995591
0					0			homoz	TS-089	BIG	DND1	Solyc02g088560	SL2.50ch02	50610274	2	51048996	A	T	stop_gained	c.983T>A	p.Leu328*	1187/2482	0.478243
0					0			heteroz	TS-089	BIG	MLO1	Solyc06g082820	SL2.50ch06	48492973	6	50878972	T	C	stop_lost	c.1123T>C	p.Ter375Glnext*?	1225/1945	0.62982
0	TS-090	-	-	EA02753	0	S. lycopersicum	Cocktail tomato	homoz	TS-090	BIG	BIK1	Solyc04g050970	SL2.50ch04	49186199	4	49682472	G	A	stop_gained	c.211C>T	p.Lys71*	453/2123	0.213377
0					0			homoz	TS-090	BIG	DMR1	Solyc04g008760	SL2.50ch04	2414006	4	2578746	C	T	stop_gained	c.1129C>T	p.Arg377*	1129/1134	0.995591
Puno I	TS-108	-	-	EA01989	Puno I	S. lycopersicum	Processing tomato	homoz	TS-108	BIG	BIK1	Solyc05g024290	SL2.50ch05	31013858	5	31311062	A	T	stop_gained	c.674T>A	p.Ser225*	911/1957	0.465508
Puno I					Puno I			homoz	TS-108	BIG	PMR4	Solyc01g073750	SL2.50ch01	81135674	1	75931511	C	T	stop_gained	c.2791C>T	p.Arg931*	2926/5487	0.53326
NC EBR-6	TS-121	LA3846	-	-	NC EBR-6	S. lycopersicum	Modern Fresh Market	homoz	TS-121	BIG	BIK1	Solyc04g050970	SL2.50ch04	49186199	4	49682472	G	A	stop_gained	c.211C>T	p.Lys71*	453/2123	0.213377
NC EBR-6					NC EBR-6			homoz	TS-121	BIG	MLO1	Solyc02g077570	SL2.50ch02	42468063	2	42781103	G	T	splice_donor_variant&intron_variant	c.380+1G>T
Rutgers	TS-122	LA1090	-	-	Rutgers	S. lycopersicum	Vintage Fresh Market	homoz	TS-122	BIG	DMR1	Solyc04g008760	SL2.50ch04	2414006	4	2578746	C	T	stop_gained	c.1129C>T	p.Arg377*	1129/1134	0.995591
Rutgers					Rutgers			homoz	TS-122	BIG	PMR6	Solyc02g093580	SL2.50ch02	54394569	2	54842982	C	T	splice_acceptor_variant&intron_variant	c.102-1G>A
Hacienda Calera	TS-127	LA0113	-	-	Hacienda Calera	S. lycopersicum	Landrace/Latin American cultivar	homoz	TS-127	BIG	DMR1	Solyc04g008760	SL2.50ch04	2414006	4	2578746	C	T	stop_gained	c.1129C>T	p.Arg377*	1129/1134	0.995591
Hacienda Calera					Hacienda Calera			homoz	TS-127	BIG	MLO1	Solyc02g077570	SL2.50ch02	42468063	2	42781103	G	T	splice_donor_variant&intron_variant	c.380+1G>T
Hacienda Calera					Hacienda Calera			heteroz	TS-127	BIG	PMR5	Solyc03g006220	SL2.50ch03	852558	3	939941	T	A	stop_lost	c.703T>A	p.Ter235Lysext*?	800/1288	0.621118
Florida 7547	TS-143	LA4025	-	-	Florida 7547	S. lycopersicum	Modern Fresh Market	homoz	TS-143	BIG	MLO1	Solyc02g077570	SL2.50ch02	42471760	2	42781103	G	A	stop_gained	c.899G>A	p.Trp300*	899/1128	0.796986
Florida 7547					Florida 7547			homoz	TS-143	BIG	PMR5	Solyc07g053350	SL2.50ch07	61809964	7	62344039	A	G	stop_lost	c.506A>G	p.Ter169Trpext*?	548/1473	0.37203
Chiclayo	TS-068	LA0395	-	-	Chiclayo	S. lycopersicum	Latin American cultivar	homoz	TS-068	BIG	DMR1	Solyc04g008760	SL2.50ch04	2414006	4	2578746	C	T	stop_gained	c.1129C>T	p.Arg377*	1129/1134	0.995591
Chiclayo					Chiclayo			heteroz	TS-068	BIG	BIK1	Solyc06g062920	SL2.50ch06	39717979	6	42181873	T	A	stop_lost	c.694T>A	p.Ter232Argext*?	818/1801	0.454192
Chiclayo					Chiclayo			heteroz	TS-068	BIG	BIK1	Solyc01g008860	SL2.50ch01	2886129	1	2902342	A	G	stop_lost&splice_region_variant	c.1231T>C	p.Ter411Glnext*?	1231/1233	0.998378
Chiclayo					Chiclayo			heteroz	TS-068	BIG	BIK1	Solyc01g067400	SL2.50ch01	75887538	1	70943298	A	G	stop_lost	c.424T>C	p.Ter142Glnext*?	712/2051	0.347148
Chiclayo					Chiclayo			heteroz	TS-068	BIG	BIK1	Solyc04g050970	SL2.50ch04	49186199	4	49682472	G	A	stop_gained	c.211C>T	p.Lys71*	453/2123	0.213377
Chiclayo					Chiclayo			heteroz	TS-068	BIG	PMR5	Solyc02g082950	SL2.50ch02	46562565	2	46887593	A	T	stop_lost	c.674A>T	p.Ter225Leuext*?	778/1488	0.522849
Chiclayo					Chiclayo			heteroz	TS-068	BIG	PMR6	Solyc06g071020	SL2.50ch06	43625286	6	46093406	A	T	stop_gained	c.256A>T	p.Lys86*	293/1588	0.184509
Chiclayo					Chiclayo			heteroz	TS-068	BIG	PMR6	Solyc02g080910	SL2.50ch02	45010864	2	45322652	A	C	stop_lost	c.1984T>G	p.Ter662Gluext*?	1984/2345	0.846055
Chiclayo					Chiclayo			heteroz	TS-068	BIG	PMR6	Solyc02g080910	SL2.50ch02	45010864	2	45322652	A	C	stop_lost	c.1984T>G	p.Ter662Gluext*?	1984/2345	0.846055
E-6203	TS-008	LA4024	-	-	E-6203	S. lycopersicum	Modern Processing	homoz	TS-008	BIG	BIK1	Solyc05g024290	SL2.50ch05	31013858	5	31311062	A	T	stop_gained	c.674T>A	p.Ser225*	911/1957	0.465508
E-6203					E-6203			heteroz	TS-008	BIG	BIK1	Solyc05g007050	SL2.50ch05	1640061	5	1717892	T	G	splice_donor_variant&intron_variant	c.519+2T>G
E-6203					E-6203			heteroz	TS-008	BIG	BIK1	Solyc06g062920	SL2.50ch06	39717410	6	42181873	T	G	splice_donor_variant&intron_variant	c.402+2T>G
E-6203					E-6203			heteroz	TS-008	BIG	PMR4	Solyc01g073750	SL2.50ch01	81135674	1	75931511	C	T	stop_gained	c.2791C>T	p.Arg931*	2926/5487	0.53326
0	TS-245	-	-	EA03126	0	S. lycopersicum	Processing tomato	homoz	TS-245	BIG	BIK1	Solyc04g050970	SL2.50ch04	49186199	4	49682472	G	A	stop_gained	c.211C>T	p.Lys71*	453/2123	0.213377
0					0			homoz	TS-245	BIG	DMR1	Solyc04g008760	SL2.50ch04	2414006	4	2578746	C	T	stop_gained	c.1129C>T	p.Arg377*	1129/1134	0.995591
0					0			heteroz	TS-245	BIG	BIK1	Solyc05g007050	SL2.50ch05	1640061	5	1717892	T	G	splice_donor_variant&intron_variant	c.519+2T>G
0					0			heteroz	TS-245	BIG	BIK1	Solyc01g028830	SL2.50ch01	41235068	1	38852705	G	C	stop_lost	c.670G>C	p.Ter224Glnext*?	1024/1671	0.612807
0	TS-085	-	-	-	0	0	0	homoz	TS-085	BIG	BIK1	Solyc04g050970	SL2.50ch04	49186199	4	49682472	G	A	stop_gained	c.211C>T	p.Lys71*	453/2123	0.213377
0					0			heteroz	TS-085	BIG	BIK1	Solyc05g024290	SL2.50ch05	31013858	5	31311062	A	T	stop_gained	c.674T>A	p.Ser225*	911/1957	0.465508
0					0			heteroz	TS-085	BIG	PMR4	Solyc01g073750	SL2.50ch01	81135674	1	75931511	C	T	stop_gained	c.2791C>T	p.Arg931*	2926/5487	0.53326
0	TS-113	-	-	EA01198	0	0	Processing tomato	heteroz	TS-113	BIG	BIK1	Solyc04g050970	SL2.50ch04	49186199	4	49682472	G	A	stop_gained	c.211C>T	p.Lys71*	453/2123	0.213377
0					0			heteroz	TS-113	BIG	DMR1	Solyc04g008760	SL2.50ch04	2414006	4	2578746	C	T	stop_gained	c.1129C>T	p.Arg377*	1129/1134	0.995591
Vito	TS-136	-	-	-	Vito	0	0	heteroz	TS-136	BIG	PMR6	Solyc02g080910	SL2.50ch02	45010864	2	45322652	A	C	stop_lost	c.1984T>G	p.Ter662Gluext*?	1984/2345	0.846055
Vito					Vito			heteroz	TS-136	BIG	PMR6	Solyc02g080910	SL2.50ch02	45010864	2	45322652	A	C	stop_lost	c.1984T>G	p.Ter662Gluext*?	1984/2345	0.846055
San Salvador	TS-201	LA1210	-	-	San Salvador	S. lycopersicum	Landrace/Latin American cultivar	heteroz	TS-201	BIG	PMR6	Solyc02g080910	SL2.50ch02	45011463	2	45322652	G	T	stop_gained	c.1562C>A	p.Ser521*	1562/2345	0.666098
San Salvador					San Salvador			heteroz	TS-201	BIG	PMR6	Solyc02g080910	SL2.50ch02	45011463	2	45322652	G	T	stop_gained	c.1562C>A	p.Ser521*	1562/2345	0.666098

## Sheet: Table S5 - Number of SNPs
S-Gene family	Genes					Gene Length (bp)	N° variants (total)		High impact		1 SNP every bp		Moderate impact		1 SNP every bp		low impact		1 SNP every bp		gene coordinates			1 SNP every bp (cumulative s-genes)
							BIG	ALL	BIG	ALL	BIG	ALL	BIG	ALL	BIG	ALL	BIG	ALL	BIG	ALL	start	end		BIG	ALL
PMR4	Solyc07g053980	Glucan synthase like 1 (D8R536_SELML)				6838	125	221	0	0	0	0	1	8	6838	854.75	27	37	253.259	184.811	62388193	62395031		1031.21	472.35
	Solyc02g078230	Glucan synthase like 1 (D8R536_SELML)				7811	137	229	0	0	0	0	15	40	520.733	195.275	20	41	390.55	190.512	42980821	42988632
	Solyc11g005980	Glucan synthase like 3 (D8QQF0_SELML)				13729	119	259	0	0	0	0	13	30	1056.08	457.633	20	46	686.45	298.457	776828	790557
	Solyc01g006370	Glucan synthase like 3 (D8R8I5_SELML)				21825	284	462	1	2	21825	10912.5	9	14	2425	1558.93	8	15	2728.12	1455	983795	1005620
	Solyc07g056260	Glucan synthase like 3 (D8R8I5_SELML)				25711	377	662	2	3	12855.5	8570.33	18	31	1428.39	829.387	10	24	2571.1	1071.29	64090068	64115779
	Solyc01g073750	Glucan synthase like 3 (D8R8I5_SELML)				27742	365	576	1	3	27742	9247.33	16	32	1733.88	866.938	17	25	1631.88	1109.68	81118565	81146307
	Solyc07g061920	Glucan synthase like 3 (D8R8I5_SELML)				11780	157	262	3	3	3926.67	3926.67	14	28	841.429	420.714	23	48	512.174	245.417	64801005	64812785
	Solyc03g111570	Glucan synthase like 7 (D8TE42_SELML)				25071	350	496	0	0	0	0	4	10	6267.75	2507.1	22	30	1139.59	835.7	62185065	62210136
	Solyc01g006350	Glucan synthase like 7 (D8TE42_SELML)				17956	559	866	1	1	17956	17956	5	6	3591.2	2992.67	19	22	945.053	816.182	934429	952385
	total					158463	2473	4033	8	12	19807.9	13205.2	95	199	1668.03	796.296	166	288	954.596	550.219
PMR5	Solyc06g082070	Glucan synthase-like 1				2997	117	180	0	0	0	0	1	5	2997	599.4	8	19	374.625	157.737	48008357	48011354
	Solyc06g007170	annotation not available.				6139	324	410	1	1	6139	6139	19	22	323.105	279.045	30	32	204.633	191.844	1231308	1237447
	Solyc03g006220	annotation not available.				5384	242	335	1	2	5384	2692	9	15	598.222	358.933	9	15	598.222	358.933	848503	853887
	Solyc10g008030	annotation not available.				3193	154	255	0	1	0	3193	16	21	199.562	152.048	6	10	532.167	319.3	2196279	2199472
	Solyc02g077080	Trichome birefringence-like protein (AHRD V3.3 *** G7IKB9_MEDTR				4357	141	218	0	0	0	0	2	8	2178.5	544.625	4	9	1089.25	484.111	42135296	42139653
	Solyc07g062210	Trichome birefringence-like protein (AHRD V3.3 *** G7IKB9_MEDTR)				3359	165	243	0	1	0	3359	8	10	419.875	335.9	5	11	671.8	305.364	65008011	65011370
	Solyc07g053350	Trichome birefringence-like protein (AHRD V3.3 *** G7IKB9_MEDTR)				5351	167	266	2	2	2675.5	2675.5	4	4	1337.75	1337.75	4	6	1337.75	891.833	61806270	61811621
	Solyc12g014360	protein trichome birefringence-like 41				5033	486	589	0	0	0	0	4	9	1258.25	559.222	1	4	5033	1258.25	5213918	5218951
	Solyc07g062220	Trichome birefringence-like protein (AHRD V3.3 *** G7IKB9_MEDTR)				4742	172	246	0	1	0	4742	13	16	364.769	296.375	11	22	431.091	215.545	65012381	65017123
	Solyc11g006990	Trichome birefringence-like 36 (AHRD V3.3 *** A0A061FQB5_THECC)				2565	62	191	0	0	0	0	2	12	1282.5	213.75	8	12	320.625	213.75	1487075	1489640
	Solyc10g007450	Trichome birefringence-like protein (AHRD V3.3 *** G7IKB9_MEDTR)				3142	117	161	0	1	0	3142	16	19	196.375	165.368	1	2	3142	1571	1809659	1812801
	Solyc12g044450	Trichome birefringence-like protein (AHRD V3.3 *** G7IKB9_MEDTR)				3547	174	327	0	0	0	0	9	11	394.111	322.455	5	8	709.4	443.375	38447988	38451535
	Solyc01g068420	Trichome birefringence-like protein (AHRD V3.3 *** G7IKB9_MEDTR)				2521	110	189	0	0	0	0	10	15	252.1	168.067	7	15	360.143	168.067	77672583	77675104
	Solyc07g055780	Trichome birefringence-like protein (AHRD V3.3 *** G7IKB9_MEDTR)				4945	117	209	0	0	0	0	3	8	1648.33	618.125	2	5	2472.5	989	63714067	63719012
	Solyc07g055800	Trichome birefringence-like protein (AHRD V3.3 *** G7IKB9_MEDTR)				2907	116	212	0	2	0	1453.5	4	8	726.75	363.375	2	4	1453.5	726.75	63724680	63727587
	Solyc01g068430	Trichome birefringence-like protein (AHRD V3.3 *** G7IKB9_MEDTR)				3214	82	153	0	0	0	0	1	2	3214	1607	2	7	1607	459.143	77679243	77682457
	Solyc07g055790	Trichome birefringence-like protein (AHRD V3.3 *** G7JPR2_MEDTR)				2263	80	158	0	2	0	1131.5	4	11	565.75	205.727	2	5	1131.5	452.6	63721278	63723541
	Solyc07g053330	Protein trichome birefringence (AHRD V3.3 *** A0A199W0G2_ANACO)				1897	104	163	0	1	0	1897	16	22	118.562	86.2273	9	13	210.778	145.923	61793525	61795422
	Solyc10g078910	Protein trichome birefringence (AHRD V3.3 *** TBR_ARATH)				3608	156	232	0	0	0	0	4	10	902	360.8	13	25	277.538	144.32	60561209	60564817
	Solyc01g060270	Protein trichome birefringence (AHRD V3.3 *** TBR_ARATH)				1801	19	122	0	3	0	600.333	0	14	#DIV/0!	128.643	3	7	600.333	257.286	69894965	69896766
	Solyc02g082950	Trichome birefringence-like protein (AHRD V3.3 *** G7JKP3_MEDTR)				2300	190	255	1	1	2300	2300	25	27	92	85.1852	19	21	121.053	109.524	46561600	46563900
	Solyc01g068440	Trichome birefringence-like protein (AHRD V3.3 *** G7IKB9_MEDTR)				3754	46	153	0	1	0	3754	2	5	1877	750.8	0	5	#DIV/0!	750.8	77689619	77693373
	total					79019	3341	5267	5	19	5337.8	1404.68	172	274	459.413	288.391	151	257	523.305	307.467
PMR6	Solyc11g008140	Pectate lyase family protein (D7LXH4_ARALY)				3892	693	1347	0	1	0	3892	4	8	973	486.5	2	4	1946	973	2407048	2410940
	Solyc03g071570	Pectate lyase-like protein (Q6U6I9_BRANA)				4163	185	344	0	0	0	0	5	9	832.6	462.556	1	1	4163	4163	18202566	18206729
	Solyc05g055510	Pectate lyase family protein (D7LXH4_ARALY)				2913	178	234	1	1	2913	2913	4	6	728.25	485.5	13	16	224.077	182.062	65130199	65133112
	Solyc09g008380	Pectate lyase-like protein (Q56XU8_ARATH)				5393	206	285	0	0	0	0	1	1	5393	5393	9	12	599.222	449.417	1844382	1849775
	Solyc09g091430	Pectate lyase 1-27 (B9TU35_9ROSI)				4371	197	349	0	0	0	0	2	5	2185.5	874.2	6	8	728.5	546.375	70703546	70707917
	Solyc06g083580	Pectate lyase 1-27 (B9TU35_9ROSI)				6027	85	193	0	0	0	0	6	15	1004.5	401.8	4	13	1506.75	463.615	48943373	48949400
	Solyc05g014000	Pectate lyase (D3IZZ1_GOSHE)				2806	326	407	0	0	0	0	7	9	400.857	311.778	4	4	701.5	701.5	7501147	7503953
	Solyc02g093580	Tomato 9612 mRNA (manually curated)				2000	84	123	1	2	2000	1000	6	11	333.333	181.818	4	4	500	500	54392803	54394803
	Solyc03g111690	Pectate lyase (Q2Z1Y4_PRUMU)				2151	322	425	1	1	2151	2151	7	9	307.286	239	1	2	2151	1075.5	62343287	62345438
	Solyc09g061890	Pectate lyase 1-27 (B9TU35_9ROSI)				3693	934	1319	0	0	0	0	1	1	3693	3693	7	8	527.571	461.625	60618611	60622304
	Solyc05g007080	Pectate lyase family protein (D7M6R5_ARALY)				3019	37	138	0	0	0	0	4	8	754.75	377.375	5	9	603.8	335.444	1665367	1668386
	Solyc01g010740	Pectate lyase family protein (D7M6R5_ARALY)				3970	273	414	1	1	3970	3970	8	12	496.25	330.833	4	11	992.5	360.909	5778009	5781979
	Solyc02g087670	Pectate lyase family protein (D7M6R5_ARALY)				1993	107	174	4	4	498.25	498.25	8	21	249.125	94.9048	8	10	249.125	199.3	50023499	50025492
	Solyc03g113150	Pectate lyase family protein (D7LQ55_ARALY)				2329	96	168	0	0	0	0	4	8	582.25	291.125	12	17	194.083	137	63409275	63411604
	Solyc06g071020	Pectate lyase (B6TSP4_MAIZE)				2019	36	108	2	2	1009.5	1009.5	5	11	403.8	183.545	3	11	673	183.545	43624823	43626842
	Solyc03g058890	Pectate lyase family protein (D7LQ55_ARALY)				2726	1370	1914	0	0	0	0	3	5	908.667	545.2	3	5	908.667	545.2	26591514	26594240
	Solyc02g080910	Pectate lyase family protein (D7ME84_ARALY)				5301	117	197	3	4	1767	1325.25	10	13	530.1	407.769	10	13	530.1	407.769	45010413	45015714
	Solyc02g080910	Pectate lyase family protein (D7ME84_ARALY)				5301	117	197	3	4	1767	1325.25	10	13	530.1	407.769	10	13	530.1	407.769	45010413	45015714
	Solyc06g071840	Pectate lyase (Q2Z1Y4_PRUMU)				3467	98	200	0	0	0	0	1	8	3467	433.375	4	7	866.75	495.286	44255013	44258480
	Solyc03g058910	Pectate lyase (B6TPL1_MAIZE)				1734	2041	3134	0	0	0	0	4	7	433.5	247.714	3	6	578	289	26603230	26604964
	Solyc02g067450	Pectate lyase family protein (D7M6R5_ARALY)				5642	263	359	1	2	5642	2821	4	5	1410.5	1128.4	6	9	940.333	626.889	37643757	37649399
	Solyc12g044750	Pectate lyase family protein (D7M222_ARALY)				1956	300	960	0	1	0	1956	0	3	#DIV/0!	652	1	4	1956	489	37875581	37877537
	total					76866	8065	12989	17	23	1792.65	1325	104	188	739.096	408.862	120	187	640.55	411.048
DMR1	Solyc04g008760	Homoserine kinase (D2DKF1_SOYBN)				1133	147	215	1	1	1133	1133	6	6	188.833	188.833	6	12	188.833	94.4167	2412878	2414011
	total					1133	147	215	1	1	49708	49708	6	6	188.833	188.833	6	12	188.833	94.4167
DMR6	Solyc03g080190	Flavanone 3-hydroxylase-like protein (Q9FLV0_ARATH)				4939	386	550	1	2	4939	2469.5	4	5	1234.75	987.8	3	5	1646.33	987.8	52078938	52083877
	Solyc06g073080	Flavonol synthase/flavanone 3-hydroxylase (FLS_PETHY)				2957	48	225	0	1	0	2957	3	14	985.667	211.214	4	14	739.25	211.214	45017961	45020918
	total					7896	434	775	1	3	89212	29737.3	7	19	1128	415.579	7	19	1128	415.579
DND1	Solyc02g088560	Cyclic nucleotide gated channel (A9CRE4_MALDO)				3823	182	327	1	1	3823	3823	3	7	1274.33	546.143	5	13	764.6	294.077	50608396	50612219
	Solyc12g005400	Cyclic nucleotide gated channel (A9CRE4_MALDO)				5932	116	228	0	0	0	0	2	6	2966	988.667	9	18	659.111	329.556	236128	242060
	Solyc10g006800	Cyclic nucleotide gated channel (A9CRE4_MALDO)				6447	112	251	1	1	6447	6447	11	25	586.091	257.88	4	15	1611.75	429.8	1240517	1246964
	total					16202	410	806	2	2	56655	56655	16	38	1012.62	426.368	18	46	900.111	352.217
MLO1	Solyc04g049090	SlMlo1 (manually curated)				5506	846	1688	0	0	0	0	0	2	#DIV/0!	2753	1	1	5506	5506	39552675	39558181
	Solyc03g095650	MLO-like protein 17 (C6EWF0_VITVI)				8144	105	166	0	3	0	2714.67	1	4	8144	2036	2	4	4072	2036	56833316	56841460
	Solyc06g010030	MLO-like protein 3 (C6EWE6_VITVI)				6064	2325	2596	0	0	0	0	4	4	1516	1516	10	11	606.4	551.273	4786764	4792828
	Solyc11g069220	MLO-like protein 3 (C6EWE6_VITVI)				7193	167	256	0	0	0	0	7	11	1027.57	653.909	5	11	1438.6	653.909	53856033	53863226
	Solyc02g082430	MLO-like protein 3 (C6EWE6_VITVI)				6387	116	257	0	2	0	3193.5	2	4	3193.5	1596.75	2	5	3193.5	1277.4	46116758	46123145
	Solyc00g007200	MLO-like protein 3 (C6EWE6_VITVI)				6525	490	667	0	0	0	0	0	1	#DIV/0!	6525	0	9	#DIV/0!	725	6816892	6823417
	Solyc06g010010	Mlo like protein (Q0WWA7_ARATH)				7019	307	345	2	2	3509.5	3509.5	20	22	350.95	319.045	13	15	539.923	467.933	4699552	4706571
	Solyc08g067760	MLO-like protein 3 (C6EWE6_VITVI)				5822	295	657	0	3	0	1940.67	1	10	5822	582.2	1	6	5822	970.333	56747912	56753734
	Solyc08g015870	MLO-like protein 7 (C6EWE8_VITVI)				4943	189	396	0	1	0	4943	6	13	823.833	380.231	3	10	1647.67	494.3	6173940	6178883
	Solyc01g102520	MLO-like protein 1 (Q94CG7_MAIZE)				3579	108	174	0	0	0	0	4	10	894.75	357.9	8	14	447.375	255.643	91311060	91314639
	Solyc07g063260	MLO-like protein 14 (B6SWK8_MAIZE)				7555	141	227	0	0	0	0	1	5	7555	1511	1	9	7555	839.444	65771745	65779300
	Solyc06g082820	MLO-like protein 1 (C6EWE5_VITVI)				4362	86	157	2	3	2181	1454	5	10	872.4	436.2	6	12	727	363.5	48489673	48494035
	Solyc02g077570	MLO-like protein 6 (C6EWE7_VITVI)				4842	134	201	2	2	2421	2421	16	24	302.625	201.75	8	14	605.25	345.857	42467244	42472086
	total					77941	5309	7787	6	16	8505.67	3189.62	67	120	1163.3	649.508	60	121	1299.02	644.14
CPR5	Solyc04g054170	CPR5 (Fragment) (B0ZWT2_ARATH)				7534	653	873	0	0	0	0	2	6	3767	1255.67	6	9	1255.67	837.111	51873591	51881125
	total					7534	653	873	0	0	0	0	2	6	3767	1255.67	6	9	1255.67	837.111
BIK1	Solyc10g084770	Receptor-like protein kinase At3g21340 (RLK6_ARATH)				2806	89	141	0	0	0	0	3	10	935.333	280.6	5	10	561.2	280.6	64191839	64194645
	Solyc04g011520	Serine/threonine kinase-like protein ABC1063 (Q1KMP8_HORVD)				4625	159	291	0	0	0	0	0	1	#DIV/0!	4625	8	14	578.125	330.357	3956690	3961315
	Solyc09g010850	ATP binding / serine-threonine kinase (C5DB71_VITVI)				2976	310	512	0	0	0	0	3	4	992	744	4	7	744	425.143	4169558	4172534
	Solyc06g005500	tomato protein kinase 1b (manually curated)				3182	223	304	2	2	1591	1591	11	12	289.273	265.167	3	4	1060.67	795.5	525975	529157
	Solyc05g053930	ATP binding / serine-threonine kinase (C5DB71_VITVI)				3077	167	248	0	0	0	0	5	9	615.4	341.889	7	10	439.571	307.7	63954180	63957257
	Solyc05g007140	Receptor-like protein kinase At3g21340 (RLK6_ARATH)				3685	204	643	0	1	0	3685	1	4	3685	921.25	2	6	1842.5	614.167	1733186	1736871
	Solyc01g010660	Receptor-like protein kinase At3g21340 (RLK6_ARATH)				6629	179	327	0	0	0	0	1	5	6629	1325.8	1	2	6629	3314.5	5673997	5680626
	Solyc05g007050	ATP binding / serine-threonine kinase (C5DB71_VITVI)				6020	48	240	1	1	6020	6020	3	7	2006.67	860	2	11	3010	547.273	1637910	1643930
	Solyc01g010780	ATP binding / serine-threonine kinase (C5DB71_VITVI)				5574	135	247	0	0	0	0	2	5	2787	1114.8	2	4	2787	1393.5	5831702	5837276
	Solyc07g007980	ATP binding / serine-threonine kinase (C5DB71_VITVI)				3386	63	235	0	0	0	0	1	6	3386	564.333	1	1	3386	3386	2672425	2675811
	Solyc03g032150	Serine/threonine kinase-like protein ABC1063 (Q1KMP8_HORVD)				5169	75	184	0	2	0	2584.5	5	9	1033.8	574.333	9	15	574.333	344.6	4653491	4658660
	Solyc11g062400	ATP binding / serine-threonine kinase (C5DB71_VITVI)				3008	466	672	0	0	0	0	1	1	3008	3008	4	8	752	376	49403389	49406397
	Solyc00g007060	Serine/threonine kinase-like protein ABC1063 (Q1KMP8_HORVD)				5561	209	330	0	0	0	0	2	2	2780.5	2780.5	3	3	1853.67	1853.67	6674808	6680369
	Solyc01g008870	ATP binding / serine-threonine kinase (C5DB71_VITVI)				2943	107	176	1	1	2943	2943	4	7	735.75	420.429	1	7	2943	420.429	2892754	2895697
	Solyc01g112220	Serine/threonine protein kinase-like (Q5XWQ1_SOLTU)				2488	166	215	0	0	0	0	5	5	497.6	497.6	6	6	414.667	414.667	98271488	98273976
	Solyc10g074710	ATP binding / serine-threonine kinase (C5DB71_VITVI)				3013	306	526	0	0	0	0	0	0	#DIV/0!	#DIV/0!	0	2	#DIV/0!	1506.5	58327353	58330366
	Solyc12g009310	ATP binding / serine-threonine kinase (C5DB71_VITVI)				3616	224	301	0	0	0	0	5	7	723.2	516.571	6	8	602.667	452	2586788	2590404
	Solyc04g082500	ATP binding / serine-threonine kinase (C5DB71_VITVI)				4167	256	350	0	0	0	0	5	9	833.4	463	5	9	833.4	463	66152655	66156822
	Solyc07g042590	ATP binding / serine-threonine kinase (C5DB71_VITVI)				5310	209	344	0	5	0	1062	2	4	2655	1327.5	1	3	5310	1770	56055036	56060346
	Solyc12g077390	ATP binding / serine-threonine kinase (C5DB71_VITVI)				2031	287	591	1	1	2031	2031	0	5	#DIV/0!	406.2	2	3	1015.5	677	18845982	18848013
	Solyc05g025820	ATP binding / serine-threonine kinase (C5DB71_VITVI)				1930	835	1145	0	1	0	1930	3	8	643.333	241.25	2	4	965	482.5	36956235	36958165
	Solyc02g087830	ATP binding / serine-threonine kinase (C5DB71_VITVI)				2858	61	126	1	2	2858	1429	9	22	317.556	129.909	4	17	714.5	168.118	50091700	50094558
	Solyc07g041940	ATP binding / serine-threonine kinase (C5DB71_VITVI)				2257	328	622	0	0	0	0	6	10	376.167	225.7	1	7	2257	322.429	54672988	54675245
	Solyc12g049360	Receptor-like protein kinase At3g21340 (RLK6_ARATH)				2490	330	576	0	0	0	0	2	5	1245	498	3	5	830	498	36987083	36989573
	Solyc01g028830	ATP binding / serine-threonine kinase (C5DB71_VITVI)				3822	1512	2622	1	1	3822	3822	1	2	3822	1911	0	2	#DIV/0!	1911	41232211	41236033
	Solyc08g074980	ATP binding / serine-threonine kinase (C5DB71_VITVI)				2984	113	330	0	1	0	2984	4	12	746	248.667	5	14	596.8	213.143	59107456	59110440
	Solyc08g061250	ATP binding / serine-threonine kinase (C5DB71_VITVI)				2070	453	715	0	0	0	0	1	4	2070	517.5	2	3	1035	690	48305701	48307771
	Solyc06g062920	auxin-regulated dual specificity cytosolic kinase (manually curated)				2194	179	247	2	2	1097	1097	2	3	1097	731.333	1	3	2194	731.333	39716883	39719077
	Solyc01g008860	ATP binding / serine-threonine kinase (C5DB71_VITVI)				2535	135	213	2	2	1267.5	1267.5	10	17	253.5	149.118	4	14	633.75	181.071	2886127	2888662
	Solyc06g005520	ATP binding / serine-threonine kinase (C5DB71_VITVI)				3884	339	467	0	0	0	0	3	3	1294.67	1294.67	10	11	388.4	353.091	546476	550360
	Solyc01g088690	ATP binding / serine-threonine kinase (C5DB71_VITVI)				3071	139	209	1	1	3071	3071	14	15	219.357	204.733	9	13	341.222	236.231	83437740	83440811
	Solyc09g075720	ATP binding / serine-threonine kinase (C5DB71_VITVI)				2141	179	219	0	0	0	0	12	15	178.417	142.733	21	23	101.952	93.087	67338513	67340654
	Solyc08g077560	ATP binding / serine-threonine kinase (C5DB71_VITVI)				4303	147	217	1	1	4303	4303	8	10	537.875	430.3	3	6	1434.33	717.167	61541667	61545970
	Solyc06g083500	Serine/threonine-protein kinase (C6ZRV0_SOYBN)				3773	109	201	1	1	3773	3773	1	6	3773	628.833	7	14	539	269.5	48904883	48908656
	Solyc09g008010	ATP binding / serine-threonine kinase (C5DB71_VITVI)				5059	148	229	0	0	0	0	3	6	1686.33	843.167	6	7	843.167	722.714	1486900	1491959
	Solyc04g082510	Serine/threonine-protein kinase (C6ZRV0_SOYBN)				3336	120	175	0	0	0	0	1	5	3336	667.2	2	4	1668	834	66163398	66166734
	Solyc12g094680	Serine/threonine-protein kinase (C6ZRV0_SOYBN)				2757	150	218	0	0	0	0	7	12	393.857	229.75	12	24	229.75	114.875	64835508	64838265
	Solyc10g006340	Serine/threonine-protein kinase (C6ZRV0_SOYBN)				2658	75	134	0	1	0	2658	6	14	443	189.857	11	30	241.636	88.6	972310	974968
	Solyc01g067400	Serine/threonine-protein kinase (C6ZRV0_SOYBN)				9561	561	1114	2	4	4780.5	2390.25	3	17	3187	562.412	4	11	2390.25	869.182	75879603	75889164
	Solyc09g061330	Serine/threonine-protein kinase (C6ZRV0_SOYBN)				2747	590	792	0	0	0	0	26	29	105.654	94.7241	32	35	85.8438	78.4857	58717095	58719842
	Solyc11g072660	Receptor protein kinase-like protein (Q9LJU5_ARATH)				4155	142	223	0	0	0	0	10	18	415.5	230.833	4	10	1038.75	415.5	55884048	55888203
	Solyc12g005160	Receptor protein kinase-like protein (Q9LJU5_ARATH)				2010	95	138	0	0	0	0	12	17	167.5	118.235	16	23	125.625	87.3913	117402	119412
	Solyc05g024290	Serine/threonine-protein kinase (C6ZRV0_SOYBN)				9913	635	988	1	1	9913	9913	1	4	9913	2478.25	1	4	9913	2478.25	31012552	31022465
	Solyc10g085990	Receptor protein kinase-like protein (Q9LJU5_ARATH)				4455	129	187	0	0	0	0	1	2	4455	2227.5	5	7	891	636.429	64979123	64983578
	Solyc09g007170	Serine/threonine kinase (Q32SF8_HORVD)				6476	100	170	0	0	0	0	0	1	#DIV/0!	6476	12	15	539.667	431.733	793123	799599
	Solyc06g075550	Serine/threonine kinase (Q32SF8_HORVD)				3741	35	130	0	1	0	3741	2	8	1870.5	467.625	7	13	534.429	287.769	46912732	46916473
	Solyc10g005300	Serine/threonine-protein kinase (C6ZRV0_SOYBN)				2457	86	166	0	5	0	491.4	6	14	409.5	175.5	6	10	409.5	245.7	220068	222525
	Solyc07g064340	Serine/threonine-protein kinase (C6ZRV0_SOYBN)				3443	73	142	0	1	0	3443	11	20	313	172.15	3	10	1147.67	344.3	66532119	66535562
	Solyc01g079340	Receptor-like kinase (A7VM33_MARPO)				7480	145	442	0	1	0	7480	1	15	7480	498.667	2	15	3740	498.667	78433449	78440929
	Solyc02g094380	Serine/threonine-protein kinase (C6ZRV0_SOYBN)				2593	61	117	0	0	0	0	7	17	370.429	152.529	2	8	1296.5	324.125	54921482	54924075
	Solyc04g050970	Receptor protein kinase-like protein (Q9LRY1_ARATH)				2533	903	1225	1	2	2533	1266.5	5	9	506.6	281.444	3	5	844.333	506.6	49184225	49186758
	total					194952	12789	21376	18	41	2393.94	1051	237	452	822.582	431.31	272	500	716.735	389.904
SR1	Solyc01g105230	Calmodulin-binding transcription activator 2 (Q0WNN4_ARATH)				10821	89	257	0	2	0	5410.5	9	24	1202.33	450.875	4	15	2705.25	721.4	93464755	93475576
	total					10821	89	257	0	2	0	36209	9	24	1202.33	450.875	4	15	2705.25	721.4

## Sheet: Table S6 - sgRNA
GENE FAMILY	GENE NAME	SeqID	minMM_NGG	minMM_NAG	Spacer seq (5'->3')	PAM (5'->3')	strand	location	class
PMR4	Solyc07g056260	Chr7:61414763-61414782:rc	4+	4+	TTGCCTTCGTACCGACAGGC	TGGGGCATTC	-	exon	A0
	Solyc07g056260	Chr7:61416034-61416053:rc	4+	4+	GAGAGGATTTCGCACGGCCC	TGGGTGATTT	-	exon	A0
	Solyc07g056260	Chr7:61420927-61420946	4+	4+	ACTACGGTCTCGCTGTTCAC	TGGACTTCTT	+	exon	A0
	Solyc07g056260	Chr7:61433018-61433037	4+	4+	TGTTGCTTGTCACAGCCCGG	CGGAAACCTG	+	exon	A0
	Solyc07g056260	Chr7:61415913-61415932:rc	4+	3+	GGTTCTAAATATCGAGCTAC	TGGTCGTGGC	-	exon	A0.1
	Solyc07g056260	Chr7:61420526-61420545	4+	3+	TCCCCAATTTTAGGCGGGCC	AGGAAGCTTG	+	exon	A0.1
	Solyc01g006370	Chr1:989950-989969	4+	3+	AGCACCTCCTCCGTGTAGTA	TGGGGTCAAG	+	exon	A0.1
	Solyc01g006370	Chr1:1004015-1004034	4+	3+	CGCCGCTGCAGCGACGGCTC	CGGTCCCCCT	+	exon	A0.1
	Solyc01g073750	Chr1:25499-25518	4+	4+	TTGGGCTAGTGAAGCCCGGA	GGGCAAGAAG	+	exon	A0
	Solyc01g073750	Chr1:25559-25578	4+	4+	GGATTCTAATGAGGCCGACC	CGGCCCGTAA	+	exon	A0
	Solyc07g061920	Chr7:62028763-62028782:rc	4+	4+	TACAAGTTTAAGAACCGCTG	AGGTGATGAA	-	exon	A0
	Solyc01g006350	Chr1:950346-950365	4+	3+	TCACGGACAGGTCGTGTTAC	AGGCATCTCC	+	exon	A0.1
	Solyc01g006350	Chr1:934803-934822	4+	4+	CCAGCCCTCGACTGAACGCT	TGGTTGAACA	+	exon	A0
PMR5	Solyc06g007170	Chr6:1236821-1236840:rc	4+	3+	TGCCGGTGGTCCAATCGCTT	GGGCTGATAT	-	exon	A0.1
	Solyc06g007170	Chr6:1236835-1236854:rc	4+	4+	TGACGAGGTCGACGTGCCGG	TGGTCCAATC	-	exon	A0
	Solyc06g007170	Chr6:1236838-1236857:rc	4+	3+	TGATGACGAGGTCGACGTGC	CGGTGGTCCA	-	exon	A0.1
	Solyc06g007170	Chr6:1236895-1236914:rc	4+	4+	CGTGCCCGGATACGCCGTGC	CGGTCATCGG	-	exon	A0
	Solyc06g007170	Chr6:1236887-1236906	4+	4+	GATGACCGGCACGGCGTATC	CGGGCACGTT	+	exon	A0
	Solyc06g007170	Chr6:1236888-1236907	4+	4+	ATGACCGGCACGGCGTATCC	GGGCACGTTC	+	exon	A0
	Solyc07g053350	Chr7:59133544-59133563	4+	4+	ACGTCTTGATTTTCAACAGC	TGGCATTGGT	+	exon	B0
	Solyc02g082950	Chr2:41139723-41139742:rc	4+	4+	GCTAGATAACGAGCTTATCT	GGGTCTGCTT	-	exon	B0
	Solyc02g082950	Chr2:41139779-41139798	4+	4+	CAATCTCGCCCTCTGTATAA	TGGGACAAAT	+	exon	B0
	Solyc03g006220	Chr3:850023-850042:rc	4+	3+	CGCAGAAATTGATTCTTTTC	TGGTAAAAGA	-	exon	B0.1
	Solyc03g006220	Chr3:851816-851835	4+	3+	ATATGTTGATTTTCAATTCT	TGGCATTGGT	+	exon	B0.1
	Solyc03g006220	Chr3:851849-851868	4+	3+	CTCACAAGGGAAAATCTCAA	GGGTAATTAC	+	exon	B0.1
	Solyc03g006220	Chr3:853546-853565:rc	4+	3+	GTAGATGATGGTAATCCTCC	TGGATATGTT	-	exon	B0.1
	Solyc03g006220	Chr3:853663-853682	4+	3+	GCATATAGTGGACAACACCC	TGGTAATGAT	+	exon	B0.1
	Solyc03g006220	Chr3:853723-853742:rc	4+	3+	AGAAGTTGGTTCCAAGTGTC	TGGTAGACCA	-	exon	B0.1
PMR6	Solyc05g055510	Chr5:64277408-64277427	4+	3+	GCAATCCGATCGACGACTGC	TGGCGGTGCG	+	exon	A0.1
	Solyc05g055510	Chr5:64277511-64277530	4+	4+	GAAAGGCGGCCGGTATTACC	TGGTTAGCGA	+	exon	A0
	Solyc05g055510	Chr5:64277586-64277605:rc	4+	4+	CATCCTGGATCACCGCGTGC	CGGAGGGTTC	-	exon	A0
	Solyc05g055510	Chr5:64277571-64277590	4+	4+	CCCTGGAACCCTCCGGCACG	CGGTGATCCA	+	exon	A0
	Solyc05g055510	Chr5:64277698-64277717	4+	4+	GCGAACGTCCACGTCACGGG	TGGTGGATGT	+	exon	A0
	Solyc05g055510	Chr5:64279151-64279170	4+	3+	GAACAACCATTGCCGCCAAC	CGGAGCAGTA	+	exon	A0.1
	Solyc02g093580	Chr2:48972366-48972385:rc	4+	4+	GGCTATTTATCGTGCGGATC	AGGGAATCCA	-	exon	A0
	Solyc03g111690	Chr3:56396908-56396927	4+	4+	GGGTATTTATCGTGTGGTAC	CGGAAATCCA	+	exon	A0
	Solyc03g111690	Chr3:56397076-56397095	4+	4+	AATGCCGTCACTCCGAAGCC	GGGGACTCTC	+	exon	A0
	Solyc01g010740	Chr1:5779527-5779546:rc	4+	3+	CATTGGCAAATGTACGCGAT	TGGTGGCAGT	-	exon	A0.1
	Solyc01g010740	Chr1:5779615-5779634:rc	4+	3+	TGCATTCAATCGGTTCGGGG	AGGGATTGAT	-	exon	A0.1
	Solyc01g010740	Chr1:5780203-5780222:rc	4+	3+	TGAATCAGATGATAACGTGC	AGGAACCAAA	-	exon	A0.1
	Solyc02g087670	Chr2:44602283-44602302	4+	3+	GATAAGACCATTGACGGCCG	TGGAGTTAAT	+	exon	A0.1
	Solyc06g071020	Chr6:40015322-40015341:rc	4+	4+	TTCACCATATCGGTGTCCCC	AGGGTCAGTT	-	exon	A0
	Solyc06g071020	Chr6:40016420-40016439	4+	4+	GGGCAGGATCAGACGCAGGC	AGGCTAACAA	+	exon	A0
	Solyc02g080910	Chr2:39588428-39588447:rc	4+	3+	ATTGCTCCAAAATACACGAG	AGGACAATCG	-	exon	A0.1
	Solyc02g080910	Chr2:39593032-39593051:rc	4+	4+	CGGGATAGTCCGGTGCATGC	CGGCCATCGT	-	exon	A0
	Solyc02g080910	Chr2:39593294-39593313	4+	4+	GGTTGACCGGGTCATCGGAC	GGGTTAGTAA	+	exon	A0
	Solyc02g067450	Chr2:32223021-32223040:rc	4+	4+	GGCTTCGGTAGCAAGGCTAC	TGGTGGTAAA	-	exon	A0
	Solyc02g067450	Chr2:32223028-32223047:rc	4+	3+	TGCAATGGGCTTCGGTAGCA	AGGCTACTGG	-	exon	A0.1
DMR1	Solyc04g008760	Chr4:2413054-2413073	4+	3+	CTCCGTCAAGTCGTTTGCTC	CGGCCACTGT	+	exon	A0.1
	Solyc04g008760	Chr4:2413621-2413640	4+	3+	GAGGGCGGTATTGCCATCGG	AGGTGACAAT	+	exon	A0.1
DMR6	Solyc03g080190	Chr3:45630168-45630187	4+	4+	TTCCGATAGACGTGGTCTAT	CGGATTCGGG	+	exon	A0
DND1	Solyc02g088560	Chr2:45186848-45186867	4+	4+	ATGAACACAACCCTGTGCAC	TGGATCTCCT	+	exon	A0
	Solyc02g088560	Chr2:45189378-45189397:rc	4+	4+	GGCACACATCGGGGCCGTTC	GGGCGTGTAT	-	exon	A0
	Solyc02g088560	Chr2:45189361-45189380	4+	4+	GGGTCTAATACACGCCCGAA	CGGCCCCGAT	+	exon	A0
	Solyc02g088560	Chr2:45189393-45189412	4+	4+	GTGCCGGCTGCGACTGGACC	GGGATTTTCC	+	exon	A0
MLO1	Solyc06g082820	Chr6:44782014-44782033	4+	3+	AGACTACAGAGCGCTTCGTT	TGGGATTCAT	+	exon	A0.1
	Solyc06g010010	Chr6:4699905-4699924:rc	4+	4+	CGGTCTTCCTATGCTTTTTG	AGGCACTTCA	-	exon	B0
	Solyc06g010010	Chr6:4699920-4699939	4+	4+	GACCGCTTTGTTTGAAGCTG	TGGAGAAACT	+	exon	B0
	Solyc06g010010	Chr6:4703380-4703399	4+	4+	ATTACGCCATGGCTTCATTA	CGGTCAGTAT	+	exon	B0
	Solyc02g077570	Chr2:37045142-37045161:rc	4+	4+	ACAACAGCAATAGCCCATGT	TGGTGTTGTC	-	exon	B0
	Solyc02g077570	Chr2:37048615-37048634	4+	4+	GACTACTTAACTCTCCGGCA	TGGATTCATA	+	exon	B0
	Solyc02g077570	Chr2:37048626-37048645	4+	4+	TCTCCGGCATGGATTCATAA	TGGTATTTAC	+	exon	B0
	Solyc02g077570	Chr2:37049063-37049082:rc	4+	4+	AAGGAAGCCAATAGGTGCTA	TGGAACACTA	-	exon	B0
BIK1	Solyc06g005500	Chr6:527496-527515	4+	3+	GTTCATGCCTCGGGGCAGCT	TGGAAAACCA	+	exon	A0.1
	Solyc06g005500	Chr6:528652-528671:rc	4+	4+	TGGATAGGCACCGCAGGGCA	AGGTTAGCTA	-	exon	A0
	Solyc06g005500	Chr6:528657-528676:rc	4+	4+	ATCTTTGGATAGGCACCGCA	GGGCAAGGTT	-	exon	A0
	Solyc12g077390	Chr12:56897543-56897562:rc	4+	4+	AACCTGCTGCGTTCGTGCGC	GGGATCAAGT	-	exon	A0
	Solyc01g028830	Chr1:33506328-33506347	4+	4+	GTAAGGTTTTGTTCTCGGGC	TGGTTTCGAT	+	exon	A0
	Solyc01g028830	Chr1:33508836-33508855	4+	3+	TTGTAGCTGAGCTACGACGC	AGGTCTTCTA	+	exon	A0.1
	Solyc01g008860	Chr1:2886152-2886171:rc	4+	4+	GGTGCTCGGTCGATCTCCCG	GGGGCGGAAC	-	exon	A0
	Solyc06g083500	Chr6:45195231-45195250:rc	4+	4+	ACATTCCTTTGGGCCGAATC	GGGTAAAGGG	-	exon	A0
	Solyc01g067400	Chr1:68270871-68270890	4+	4+	GCTTGGTAAAGTCCTCGCAT	TGGGTAACGA	+	exon	A0
	Solyc01g067400	Chr1:68278348-68278367:rc	4+	4+	TCGGCTGGAAAGCACCGGAC	AGGTAGGTGT	-	exon	A0
	Solyc05g024290	Chr5:31021658-31021677:rc	4+	4+	AGGGCAACTACCTAGCGGTC	AGGTAAATTC	-	exon	A0
	Solyc04g050970	Chr4:48334204-48334223	4+	4+	GCAGGGCGAGCAACCGGGAC	AGGCTTGTCC	+	exon	A0
	Solyc05g007050	Chr5:1639931-1639950	4+	4+	GGTTTCGGATGTGTCTTCAA	GGGGTGGATC	+	exon	B0
	Solyc05g007050	Chr5:1639932-1639951	4+	4+	GTTTCGGATGTGTCTTCAAG	GGGTGGATCG	+	exon	B0
	Solyc05g007050	Chr5:1639935-1639954	4+	4+	TCGGATGTGTCTTCAAGGGG	TGGATCGAAG	+	exon	B0
	Solyc05g007050	Chr5:1640182-1640201:rc	4+	4+	TAGGGTGAACGAGATCACCC	AGGAAATTCA	-	exon	B0
	Solyc05g007050	Chr5:1642719-1642738:rc	4+	4+	ACATGTGTCTTATCACCCTC	AGGACCATCT	-	exon	B0
	Solyc05g007050	Chr5:1643414-1643433:rc	4+	4+	CTCATCATAGGCCTAACTTT	GGGATCACGA	-	exon	B0
	Solyc05g007050	Chr5:1643561-1643580	4+	4+	CAGGGATCATTCTCGAGGAA	TGGACAACAA	+	exon	B0
	Solyc01g008870	Chr1:2893616-2893635:rc	4+	4+	AGGGAGTTCAGACTATACCT	TGGGCTACAC	-	exon	B0
	Solyc01g008870	Chr1:2894121-2894140	4+	4+	CGATGCCCTTGGAAGCTTTC	GGGCTTAAGT	+	exon	B0
	Solyc01g008870	Chr1:2894245-2894264	4+	4+	CGCCAAGAAGGCTATCAGCT	CGGAAGTTCC	+	exon	B0
	Solyc02g087830	Chr2:44669663-44669682:rc	4+	4+	TACCCTTAGTAACAAGCAGA	AGGGGAAACG	-	exon	B0
	Solyc02g087830	Chr2:44669658-44669677	4+	4+	CCCCTTCTGCTTGTTACTAA	GGGTATAGCT	+	exon	B0
	Solyc02g087830	Chr2:44669683-44669702	4+	4+	TAGCTAGCCGGTGACGCATT	TGGACCAGTT	+	exon	B0
	Solyc02g087830	Chr2:44669692-44669711	4+	4+	GGTGACGCATTTGGACCAGT	TGGAGAATTG	+	exon	B0
	Solyc02g087830	Chr2:44669914-44669933	4+	4+	GAGAAATTGCCACCAAGACG	AGGATCTATA	+	exon	B0
	Solyc02g087830	Chr2:44670340-44670359:rc	4+	4+	CTCGCCAGAGATGGGCCAGA	GGGAGATCAG	-	exon	B0
	Solyc02g087830	Chr2:44670341-44670360:rc	4+	4+	ACTCGCCAGAGATGGGCCAG	AGGGAGATCA	-	exon	B0
	Solyc02g087830	Chr2:44670371-44670390	4+	4+	ATAGCTTCGCGTTGTAGTCC	TGGAATGACA	+	exon	B0
	Solyc02g087830	Chr2:44670544-44670563:rc	4+	4+	ATTAGGGGCAGCACAAGGCC	TGGCTTATCT	-	exon	B0
	Solyc02g087830	Chr2:44670567-44670586	4+	4+	ATTCTTATCCTCGTGCACCA	CGGAAGAACC	+	exon	B0
	Solyc02g087830	Chr2:44670709-44670728:rc	4+	4+	GTCTACGAGTTTATGGCTCG	TGGGAGTCTG	-	exon	B0
	Solyc02g087830	Chr2:44671116-44671135:rc	4+	4+	AACCACTCCTGATAGAGGCA	TGGTACAGGA	-	exon	B0
	Solyc02g087830	Chr2:44671133-44671152	4+	4+	GTTCGAGCAGTTTCAGCGGA	AGGGCCTCCG	+	exon	B0
	Solyc06g062920	Chr6:36106969-36106988	4+	4+	TCGTTCGGAGGCGAAGGTGA	TGGAGAACAG	+	exon	B0
	Solyc06g062920	Chr6:36107520-36107539:rc	4+	4+	TCGAAAATAGTTGATCCTCG	AGGTTTCCCC	-	exon	B0
	Solyc06g062920	Chr6:36108171-36108190:rc	4+	4+	GAGGGGGCGTTTCTTGTCCA	TGGCTCGTCG	-	exon	B0
	Solyc06g062920	Chr6:36108184-36108203	4+	4+	CCCCCTCAAAGAGCGAATCT	TGGTGGATTG	+	exon	B0
	Solyc06g062920	Chr6:36108193-36108212	4+	4+	AGAGCGAATCTTGGTGGATT	GGGCAAGACC	+	exon	B0
	Solyc06g062920	Chr6:36108224-36108243:rc	4+	4+	TTGTGTGGATCCCTTAGCAT	TGGTCTTGCC	-	exon	B0
	Solyc06g062920	Chr6:36108283-36108302	4+	4+	CTCGACACAAGGAGCCAAGA	AGGTAGCTGC	+	exon	B0
	Solyc06g062920	Chr6:36108345-36108364:rc	4+	4+	GCTCATAGTAGGCCTAGACC	TGGGGTGGTG	-	exon	B0
	Solyc06g062920	Chr6:36108567-36108586	4+	4+	AGCAACGGAGAGTCGGACAC	AGGTATAAAC	+	exon	B0
	Solyc08g077560	Chr8:58708412-58708431	4+	4+	ACTCAATACACTTGGATTGC	AGGTATAAAC	+	exon	B0
	Solyc08g077560	Chr8:58709414-58709433	4+	4+	CTGGGATATTGCGCTACAGA	TGGCGAAAGA	+	exon	B0
	Solyc08g077560	Chr8:58709511-58709530	4+	4+	AAGCCGTACCTGTAGTTCCT	TGGAGAACAA	+	exon	B0
	Solyc08g077560	Chr8:58709557-58709576:rc	4+	4+	CCATCCCTTGTGCGGCACCA	AGGATAATTT	-	exon	B0
	Solyc08g077560	Chr8:58709565-58709584:rc	4+	4+	CAGATAAGCCATCCCTTGTG	CGGCACCAAG	-	exon	B0
	Solyc08g077560	Chr8:58709584-58709603	4+	4+	GCACGAGGGACTAGAAGTCC	AGGTATGCTT	+	exon	B0

## Sheet: Table S7 - Pathogen assay data
Plant N°	VF-36	MM	M-82	Droplet	Puno-I
1	3	3	2	3	3
2	3	3	1	3	3
3	3	3	2	3	2
4	3	3	3	2	3
5	3	3	3	3	3
6	3	3	2	3	3
7	3	3	1	3	3
8	3	3	1	3	2
9	3	3	3	3	3
10	3	3	3	3	2
11	3	3	3	3	2
12	3	3	3	3	3
13	3	3	3	3	3
14	3	3	3	2	3
15	3	3	3	3	2
16	3	3	3		2
17	3	3	3		3
18	3	3	3		3
19	3	3	3		2
20	3	3	3		3
21		3	3		3
22		3	1
23		3	2
24		3	3
25		3	3
26		3	3
27		3	1
28		3	1
29			3
30			2
31			3
32			1
33			3
